# Supplementary material
Source: PubMed Central journal article supplement (PMC8240005)
Supplement: jama-e219199-s002.pdf [file jama-e219199-s002.pdf]

## Supplementary Online Content 2

Florian J, Matta MK, DePalma R, et al. Effect of oral ranitidine on urinary excretion of *N*-nitrosodiethylamine (NDMA): a randomized clinical trial. *JAMA*. doi:10.1001/jama.2021.9199

|                                                                                                                                        |    |
|----------------------------------------------------------------------------------------------------------------------------------------|----|
| eTable 1. NDMA testing results from the drug product used in the study .....                                                           | 2  |
| eTable 2. Listing of participants, treatment groups, and diets where all items were not consumed on treatment days.                    | 2  |
| eTable 3. Samples below the lower limit of quantification by analyte and biospecimen .....                                             | 3  |
| eTable 4. Summary table of additional NDMA and DMA 24-hr pharmacokinetic parameters .....                                              | 3  |
| eTable 5. Summary table of 24-hr urinary excretion and pharmacokinetic parameters for ranitidine.....                                  | 4  |
| eTable 6. Listing of pre-dose and 24-hour cumulative NDMA urine levels and maximum concentration for participant 12 <sup>a</sup> ..... | 4  |
| eTable 7. Comparison of 24-hour urinary excretion of NDMA with participant 12 removed .....                                            | 5  |
| eTable 8. Comparison of 24-hour urinary excretion of NDMA with different LLOQ and limit of detection imputations .....                 | 5  |
| eTable 9. Incidence and number of adverse events by treatment group .....                                                              | 6  |
| eTable 10. Comparison of the current and prior clinical studies on ranitidine and urinary excretion of NDMA.....                       | 7  |
| eFigure 1. Individual participant cumulative 24-hr urine excretion profiles of NDMA by group.....                                      | 9  |
| eFigure 2. Arithmetic mean NDMA plasma concentration over time by group.....                                                           | 10 |
| eFigure 3. Individual participant NDMA plasma concentration profiles by group .....                                                    | 11 |
| eFigure 4. Cumulative DMA excreted in urine over 24-hours on a linear scale and DMA plasma concentration on a log scale by group.....  | 12 |
| eFigure 5. Individual participant cumulative 24-hr urine excretion profiles of DMA by group.....                                       | 13 |
| eFigure 6. Individual participant DMA plasma concentration profiles by group .....                                                     | 14 |
| eFigure 7. 24-hour urinary excretion and maximum plasma concentration of ranitidine by group.....                                      | 15 |
| eFigure 8. Geometric mean ranitidine 24-hour urinary excretion by diet.....                                                            | 16 |
| eFigure 9. Geometric mean ranitidine plasma concentration over time by diet.....                                                       | 17 |
| eFigure 10. Individual participant cumulative 24-hr urine excretion profiles of ranitidine by diet.....                                | 18 |
| eFigure 11. Individual participant ranitidine plasma concentration profiles by diet.....                                               | 19 |
| eMethods 1. Selection of Meals for Study and Full Menu Listing .....                                                                   | 20 |
| eMethods 2. Bioanalytical Methods for the Analytes and Biospecimens in the Clinical Study .....                                        | 25 |
| Bioanalytical Method Conditions for NDMA Urine Method.....                                                                             | 25 |
| Bioanalytical Method Conditions for NDMA Plasma Method .....                                                                           | 27 |
| Bioanalytical Method Conditions for DMA Method (Common Method for Urine and Plasma).....                                               | 29 |
| Bioanalytical Method Conditions for Ranitidine Urine Method .....                                                                      | 31 |
| Bioanalytical Method Conditions for Ranitidine Plasma Method.....                                                                      | 33 |
| <i>Ex vivo</i> Stability Evaluation .....                                                                                              | 35 |
| eDictionary. Data Dictionary for Participant Data Listings.....                                                                        | 37 |
| eReferences .....                                                                                                                      | 38 |

This supplementary material has been provided by the authors to give readers additional information about their work.

**eTable 1. NDMA testing results from the drug product used in the study**

| Testing Date <sup>a</sup> | Relation to Study      | NDMA Content (parts per million: ppm) | NDMA Content per 300 mg tablet (ng) |
|---------------------------|------------------------|---------------------------------------|-------------------------------------|
| November 30, 2019         | Prior to study start   | 0.021 ppm                             | 6.3 ng                              |
| March 11, 2020            | Prior to study start   | 0.025 ppm                             | 7.5 ng                              |
| July 28, 2020             | After study completion | 0.035 ppm                             | 10.5 ng                             |

<sup>a</sup>The 300 mg ranitidine drug product was tested for NDMA content three times over a 20-month period. Testing was performed using publicly available and validated liquid chromatography with high resolution mass spectrometer methods, which are available on FDA's website.<sup>1</sup> The two tests before the clinical study and the one test after the study were all substantially below the FDA's acceptable daily intake limit of 96 ng NDMA per day.

**eTable 2. Listing of participants, treatment groups, and diets where all items were not consumed on treatment days**

| Participant, Period                        | Meal      | Remaining Items                               |
|--------------------------------------------|-----------|-----------------------------------------------|
| <b>Ranitidine with noncured-meats diet</b> |           |                                               |
| 13, Period 1                               | Lunch     | Tomato, lettuce, carrots                      |
| 07, Period 1                               | Lunch     | Carrots, bread crust                          |
| <b>Placebo with noncured-meats diet</b>    |           |                                               |
| 13, Period 2                               | Lunch     | Tomato, lettuce, carrots                      |
| 07, Period 2                               | Lunch     | Carrots, bread crust, pieces of roast beef    |
| 10, Period 1                               | Dinner    | Half salad                                    |
| <b>Ranitidine with cured-meats diet</b>    |           |                                               |
| 04, Period 3                               | Lunch     | Half lettuce, tomato, bread                   |
| 13, Period 4                               | Lunch     | Tomato, coleslaw, sandwich, V8 juice          |
| 07, Period 3                               | Lunch     | Coleslaw, quarter hoagie                      |
| 14, Period 4                               | Lunch     | Half hoagie (all parts)                       |
| 09, Period 3                               | Dinner    | Half corned beef                              |
| 10, Period 4                               | Breakfast | Bread crust                                   |
| 10, Period 4                               | Lunch     | Quarter hoagie (all parts)                    |
| 10, Period 4                               | Dinner    | Corned beef                                   |
| <b>Placebo with cured-meats diet</b>       |           |                                               |
| 13, Period 3                               | Lunch     | Tomato, coleslaw, and half hoagie (all parts) |
| 07, Period 4                               | Lunch     | Coleslaw, hoagie (all parts)                  |
| 09, Period 4                               | Lunch     | Quarter hoagie (all parts)                    |
| 09, Period 4                               | Dinner    | Corned beef and half cabbage                  |
| 10, Period 3                               | Dinner    | Corned beef                                   |
| 01, Period 3                               | Lunch     | Coleslaw and half hoagie (all parts)          |

**eTable 3. Samples below the lower limit of quantification by analyte and biospecimen**

| Analyte/<br>biospecimen        | Measure                                           | Noncured-meats diet  |          | Cured-meats diet     |          |
|--------------------------------|---------------------------------------------------|----------------------|----------|----------------------|----------|
|                                |                                                   | Ranitidine           | Placebo  | Ranitidine           | Placebo  |
| NDMA/urine <sup>a</sup>        | # samples below LLOQ (%)                          | 122 (79)             | 138 (85) | 93 (64)              | 89 (63)  |
|                                | # of participants with all samples below LLOQ (%) | 9 (50)               | 7 (39)   | 3 (18)               | 3 (18)   |
| NDMA/plasma <sup>a</sup>       | # samples below LLOQ (%)                          | 209 (89)             | 211 (91) | 192 (87)             | 197 (89) |
|                                | # of participants with all samples below LLOQ (%) | 6 (33)               | 6 (33)   | 6 (35)               | 6 (35)   |
| DMA/urine <sup>a</sup>         | # samples below LLOQ (%)                          | 0 (0)                | 0 (0)    | 0 (0)                | 1 (1)    |
|                                | # of participants with all samples below LLOQ (%) | 0 (0)                | 0 (0)    | 0 (0)                | 0 (0)    |
| DMA/plasma <sup>a</sup>        | # samples below LLOQ (%)                          | 10 (5)               | 5 (2)    | 10 (5)               | 10 (5)   |
|                                | # of participants with all samples below LLOQ (%) | 0 (0)                | 0 (0)    | 0 (0)                | 0 (0)    |
| Ranitidine/urine <sup>a</sup>  | # samples below LLOQ (%)                          | 2 (1)                | -        | 0 (0)                | -        |
|                                | # of participants with all samples below LLOQ (%) | 0 (0)                | -        | 0 (0)                | -        |
| Ranitidine/plasma <sup>a</sup> | # samples below LLOQ (%)                          | 24 (11) <sup>a</sup> | -        | 24 (12) <sup>b</sup> | -        |
|                                | # of participants with all samples below LLOQ (%) | 0 (0)                | -        | 0 (0)                | -        |

LLOQ: Lower limit of quantification

<sup>a</sup>LLOQ for NDMA urine and plasma was 0.0156 ng/mL, DMA urine and plasma was 0.50 µg/mL, and ranitidine urine and plasma was 15.6 ng/mL

<sup>b</sup>Ranitidine plasma samples below LLOQ were from the 11, 14, and 24 hr samples

**eTable 4. Summary table of additional NDMA and DMA 24-hr pharmacokinetic parameters**

| Outcome                           | Diet           | Ranitidine            | Placebo        |
|-----------------------------------|----------------|-----------------------|----------------|
|                                   |                | (Median [IQR]) (n=17) |                |
| NDMA plasma T <sub>max</sub> , hr | Noncured meats | 2 (2 to 4.5)          | 11 (6.5 to 14) |
|                                   | Cured meats    | 4 (2 to 10)           | 1 (0.5 to 7.5) |
| DMA plasma T <sub>max</sub> , hr  | Noncured meats | 5 (3 to 6)            | 9 (6 to 11)    |
|                                   | Cured meats    | 4 (3 to 6)            | 6 (5 to 11)    |

IQR: Interquartile range; T<sub>max</sub>: Time of maximum concentration

**eTable 5. Summary table of 24-hr urinary excretion and pharmacokinetic parameters for ranitidine**

| Exploratory Outcomes                                 | Intervention | Cured-meats diet<br>(Geometric mean [CV%]) | Noncured-meats diet<br>(n=17) | Geometric Mean Ratio [95% CI] | P value <sup>a</sup> |
|------------------------------------------------------|--------------|--------------------------------------------|-------------------------------|-------------------------------|----------------------|
| Ranitidine 24-hr urinary excretion, mg               | Ranitidine   | 74.1 (39%)                                 | 91.7 (29%)                    | 0.81 (0.72 to 0.91)           | .001                 |
| Ranitidine Maximum plasma concentration, ng/mL       | Ranitidine   | 861 (27%)                                  | 1118 (20%)                    | 0.77 (0.65 to 0.91)           | .005                 |
| Ranitidine plasma T <sub>max</sub> , hr <sup>b</sup> | Ranitidine   | 1.5 (1.5 to 2)                             | 1.5 (1.5 to 2)                | -                             | -                    |
| Ranitidine AUC <sub>0-last</sub> , hr·ng/mL          | Ranitidine   | 3736 (29%)                                 | 4857 (21%)                    | 0.77 (0.66 to 0.89)           | .002                 |

AUC<sub>0-last</sub>: Area under the curve from time 0 to the last collected plasma sample; CI: Confidence interval; CV: Coefficient of variation; T<sub>max</sub>: Time of maximum concentration

<sup>a</sup>P values are reported as two-sided tests at a 0.05 alpha level as the impact of diet on ranitidine was not known

<sup>b</sup>T<sub>max</sub> is reported as median [interquartile range (IQR)] with no comparisons

**eTable 6. Listing of pre-dose and 24-hour cumulative NDMA urine levels and maximum concentration for participant 12<sup>a</sup>**

| Period | Treatment  | Diet           | Pre-dose amount of NDMA in urine (ng) | 24-hour cumulative NDMA in urine (ng) | Maximum NDMA plasma concentration (pg/mL) |
|--------|------------|----------------|---------------------------------------|---------------------------------------|-------------------------------------------|
| 1      | Placebo    | Noncured meats | 0                                     | 29                                    | 31.3                                      |
| 2      | Ranitidine | Noncured meats | 46                                    | 512                                   | 42.0                                      |
| 3      | Ranitidine | Cured meats    | 69                                    | 649                                   | 0                                         |
| 4      | Placebo    | Cured meats    | 150                                   | 746                                   | 16.3                                      |

<sup>a</sup>Participant 12 was an outlier for urinary excretion of NDMA in 3 of the 4 treatment groups (periods 2, 3 and 4 for this participant). Repeat analysis of the urine samples confirmed the results and review of study records indicated that all urine sample handling and processing steps were followed. The clinical staff noted the participant began menstruating between treatment periods 1 and 2, which continued through the end of the study. The participant's urinalyses at screening and check-in were negative for blood, but at check-out there was 3+ blood in the urine sample. None of the urinalyses were consistent with a urinary tract infection. Studies have noted that red blood cells contain high intracellular nitrite concentrations.<sup>2,3</sup> The *ex vivo* mixing of urine and lysed red blood cells could have released nitrite that facilitated conversion of DMA to NDMA during the relatively brief period before sodium hydroxide was added and the samples were fully frozen.

**eTable 7. Comparison of 24-hour urinary excretion of NDMA with participant 12 removed**

| Outcome                                              | Diet                                                      | Ranitidine<br>(Median [IQR]) | Placebo<br>(n=17)     | Median of Paired<br>Differences [IQR] | P value <sup>a</sup> |
|------------------------------------------------------|-----------------------------------------------------------|------------------------------|-----------------------|---------------------------------------|----------------------|
| <b>Sensitivity Analysis – Participant 12 removed</b> |                                                           |                              |                       |                                       |                      |
| NDMA 24-hr<br>urinary excretion,<br>ng               | Noncured meats                                            | 0.3<br>(0 to 11.6)           | 7.3<br>(0 to 17.4)    | -6.1<br>(-12.0 to 28.0)               | .76                  |
|                                                      | Cured meats                                               | 10.6<br>(5.2 to 41.4)        | 19.7<br>(8.0 to 31.1) | -1.6<br>(-18.9 to 10.4)               | .55                  |
|                                                      | Cured meats vs noncured meats comparison on<br>ranitidine |                              |                       | 13.1<br>(5.2 to 24.3)                 | .009                 |
|                                                      | Cured meats vs noncured meats comparison on<br>placebo    |                              |                       | 10.4<br>(3.1 to 24.4)                 | .01                  |

IQR: Interquartile range

<sup>a</sup>A 1-sided lower test was used for sensitivity analyses of ranitidine vs. placebo and for the effect of diet on NDMA.**eTable 8. Comparison of 24-hour urinary excretion of NDMA with different LLOQ and limit of detection imputations**

| Outcome                                                                                                            | Diet                                                      | Ranitidine<br>(Median [IQR]) | Placebo<br>(n=17)      | Median of Paired<br>Differences [IQR] | P value <sup>a</sup> |
|--------------------------------------------------------------------------------------------------------------------|-----------------------------------------------------------|------------------------------|------------------------|---------------------------------------|----------------------|
| <b>Sensitivity Analysis – Urine concentrations &lt; LLOQ were set to LLOQ of 0.0156 ng/mL</b>                      |                                                           |                              |                        |                                       |                      |
| NDMA 24-hr<br>urinary excretion,<br>ng                                                                             | Noncured meats                                            | 39.4<br>(32.4 to 65.8)       | 46.0<br>(41.7 to 63.3) | -0.8<br>(-10.1 to 14.4)               | .41                  |
|                                                                                                                    | Cured meats                                               | 44.9<br>(33.6 to 64.6)       | 42.8<br>(35.2 to 71.2) | -1.0<br>(-8.6 to 14.4)                | .57                  |
|                                                                                                                    | Cured meats vs noncured meats comparison on<br>ranitidine |                              |                        | 1.7<br>(-7.5 to 21.2)                 | .29                  |
|                                                                                                                    | Cured meats vs noncured meats comparison on<br>placebo    |                              |                        | -5.2<br>(-10.8 to 10.5)               | .59                  |
| <b>Sensitivity Analysis – Urine concentrations &lt; LOD (0.0078 ng/mL) set to 0; other values used as reported</b> |                                                           |                              |                        |                                       |                      |
| NDMA 24-hr<br>urinary excretion,<br>ng                                                                             | Noncured meats                                            | 4.7<br>(2.7 to 35.8)         | 17.2<br>(1.9 to 29.0)  | 0<br>(-2.7 to 5.2)                    | .34                  |
|                                                                                                                    | Cured meats                                               | 17.0<br>(9.6 to 52.2)        | 29.2<br>(13.7 to 45.2) | 0.8<br>(-10.3 to 12.4)                | .50                  |
|                                                                                                                    | Cured meats vs noncured meats comparison on<br>ranitidine |                              |                        | 9.9<br>(2.4 to 27.6)                  | .004                 |
|                                                                                                                    | Cured meats vs noncured meats comparison on<br>placebo    |                              |                        | 9.2<br>(-3.4 to 19.9)                 | .01                  |
| <b>Sensitivity Analysis – Urine concentrations &lt; LOD set to LOD; other values used as reported</b>              |                                                           |                              |                        |                                       |                      |
| NDMA 24-hr<br>urinary excretion,<br>ng                                                                             | Noncured meats                                            | 26.1<br>(17.5 to 46.5)       | 31.0<br>(21.5 to 50.6) | 0.8<br>(-10.0 to 8.6)                 | .45                  |
|                                                                                                                    | Cured meats                                               | 31.1<br>(18.8 to 56.0)       | 39.1<br>(23.4 to 59.6) | 3.9<br>(-4.9 to 10.7)                 | .43                  |
|                                                                                                                    | Cured meats vs noncured meats comparison on<br>ranitidine |                              |                        | 7.5<br>(-5.7 to 26.8)                 | .06                  |
|                                                                                                                    | Cured meats vs noncured meats comparison on<br>placebo    |                              |                        | 3.4<br>(-6.2 to 12.8)                 | .19                  |

IQR: Interquartile range; LLOQ: Lower limit of quantitation; LOD: Limit of detection

<sup>a</sup>A 1-sided lower test was used for sensitivity analyses of ranitidine vs. placebo and for the effect of diet on NDMA.

**eTable 9. Incidence and number of adverse events by treatment group**

| <b>Adverse Event<sup>a</sup></b>  | <b>Lead-In (No Treatment) – (N=18)<br/>Incidence<br/>(number of events)<sup>b</sup></b> | <b>Ranitidine + Noncured-meats diet – (N=18)<br/>Incidence<br/>(number of events)<sup>b</sup></b> | <b>Placebo + Noncured-meats diet – (N=18)<br/>Incidence<br/>(number of events)<sup>b</sup></b> | <b>Ranitidine + Cured-meats diet – (N=17)<br/>Incidence<br/>(number of events)<sup>b</sup></b> | <b>Placebo + Cured-meats diet – (N=17)<br/>Incidence<br/>(number of events)<sup>b</sup></b> |
|-----------------------------------|-----------------------------------------------------------------------------------------|---------------------------------------------------------------------------------------------------|------------------------------------------------------------------------------------------------|------------------------------------------------------------------------------------------------|---------------------------------------------------------------------------------------------|
| Abdominal Pain                    | 0 (0)                                                                                   | 1 (1)                                                                                             | 0 (0)                                                                                          | 0 (0)                                                                                          | 0 (0)                                                                                       |
| Diarrhoea                         | 0 (0)                                                                                   | 1 (1)                                                                                             | 0 (0)                                                                                          | 0 (0)                                                                                          | 0 (0)                                                                                       |
| Vaginitis gardnerella             | 1 (1)                                                                                   | 0 (0)                                                                                             | 0 (0)                                                                                          | 0 (0)                                                                                          | 0 (0)                                                                                       |
| Vaginal Discharge                 | 1 (1)                                                                                   | 0 (0)                                                                                             | 0 (0)                                                                                          | 0 (0)                                                                                          | 0 (0)                                                                                       |
| Vessel Puncture Site Inflammation | 0 (0)                                                                                   | 0 (0)                                                                                             | 0 (0)                                                                                          | 0 (0)                                                                                          | 1 (1)                                                                                       |
| Vessel Puncture Site Pain         | 0 (0)                                                                                   | 1 (1)                                                                                             | 1 (1)                                                                                          | 1 (1)                                                                                          | 1 (1)                                                                                       |

<sup>a</sup>This table reports all Medical Dictionary for Regulatory Activities (MedDRA v.23.0)-defined adverse events during the study

<sup>b</sup>First number stands for incidence and second number in parenthesis stands for number of events.

**eTable 10. Comparison of the current and prior clinical studies on ranitidine and urinary excretion of NDMA**

| Current Study                                                                                                                                                                                                                                                                                                                                                                                                                                                                               | Zeng and Mitch 2016 <sup>4,5</sup>                                                                                                                                                                                                                                   |
|---------------------------------------------------------------------------------------------------------------------------------------------------------------------------------------------------------------------------------------------------------------------------------------------------------------------------------------------------------------------------------------------------------------------------------------------------------------------------------------------|----------------------------------------------------------------------------------------------------------------------------------------------------------------------------------------------------------------------------------------------------------------------|
| <b>Study Design, Settings and Participants</b>                                                                                                                                                                                                                                                                                                                                                                                                                                              |                                                                                                                                                                                                                                                                      |
| <ul style="list-style-type: none"> <li>Utilized a placebo-controlled, crossover study design.</li> </ul>                                                                                                                                                                                                                                                                                                                                                                                    | <ul style="list-style-type: none"> <li>Utilized a baseline-controlled, parallel study design.</li> </ul>                                                                                                                                                             |
| <ul style="list-style-type: none"> <li>Enrolled 18 participants with 17 completers.</li> </ul>                                                                                                                                                                                                                                                                                                                                                                                              | <ul style="list-style-type: none"> <li>Enrolled 10 participants with 10 completers.</li> </ul>                                                                                                                                                                       |
| <ul style="list-style-type: none"> <li>Each participant was randomized to receive ranitidine 300 mg or placebo over two sets of 2 periods.</li> </ul>                                                                                                                                                                                                                                                                                                                                       | <ul style="list-style-type: none"> <li>Participants had urine collected over two consecutive days – baseline (<i>i.e.</i>, untreated) followed by treatment with ranitidine 150 mg.</li> </ul>                                                                       |
| <ul style="list-style-type: none"> <li>Each period had a specific menu; meals administered on the pre-dose and treatment days with ranitidine and placebo were identical.</li> </ul>                                                                                                                                                                                                                                                                                                        | <ul style="list-style-type: none"> <li>No information provided in the manuscript regarding meals and drinks during the study duration.</li> </ul>                                                                                                                    |
| <ul style="list-style-type: none"> <li>Participants were confined in a phase 1 clinical pharmacology unit for the entire study duration.</li> </ul>                                                                                                                                                                                                                                                                                                                                         | <ul style="list-style-type: none"> <li>No information provided in the manuscript regarding whether participants were confined for the study duration.</li> </ul>                                                                                                     |
| <ul style="list-style-type: none"> <li>Ranitidine drug product used in the study had NDMA content confirmed prior to shipment to the clinical site and again when it was returned.</li> </ul>                                                                                                                                                                                                                                                                                               | <ul style="list-style-type: none"> <li>No information provided regarding NDMA content of the ranitidine product prior to administration in the study.</li> </ul>                                                                                                     |
| <b>Urine Sample Collection</b>                                                                                                                                                                                                                                                                                                                                                                                                                                                              |                                                                                                                                                                                                                                                                      |
| <ul style="list-style-type: none"> <li>Each participant collected a series of urine samples using Commode specimen collection containers.</li> </ul>                                                                                                                                                                                                                                                                                                                                        | <ul style="list-style-type: none"> <li>Each volunteer collected a series of urine samples using Commode specimen collection containers.</li> </ul>                                                                                                                   |
| <ul style="list-style-type: none"> <li>Each voiding was collected in a separate collection container. The protocol included planned voiding times but allowed for unscheduled voids between collections.</li> </ul>                                                                                                                                                                                                                                                                         | <ul style="list-style-type: none"> <li>Each voiding was collected in a separate collection container and specific collection times varied among the volunteers.</li> </ul>                                                                                           |
| <b>Urine Sample Storage</b>                                                                                                                                                                                                                                                                                                                                                                                                                                                                 |                                                                                                                                                                                                                                                                      |
| <ul style="list-style-type: none"> <li>The <i>ex vivo</i> stability was thoroughly evaluated. An optimized sample collection protocol was developed prior to the study initiation.</li> </ul>                                                                                                                                                                                                                                                                                               | <ul style="list-style-type: none"> <li>Details on <i>ex vivo</i> stability and a complete sample handling protocol were not included in the manuscript.</li> </ul>                                                                                                   |
| <ul style="list-style-type: none"> <li>All urine voids were collected, treated with fixed amounts of sodium hydroxide, and processed according to the urine sample collection protocol (see <b>Supplement 1</b>). The samples were stored at <math>-80^{\circ}\text{C}</math> until analysis.</li> </ul>                                                                                                                                                                                    | <ul style="list-style-type: none"> <li>Immediately after collection, urine samples were preserved with a few sodium hydroxide pellets to halt nitrosation and bacterial growth and stored at <math>-20^{\circ}\text{C}</math> in the dark until analysis.</li> </ul> |
| <ul style="list-style-type: none"> <li>Sample storage containers (50 mL volume) were prepared with 240 <math>\mu\text{L}</math> of 5 M sodium hydroxide from a stock solution and placed on ice prior to sample collection. Samples were weighed and up to 40 mL was transferred to the storage container within 5 minutes otherwise a protocol deviation was logged. The 5-minute interval was determined based on <i>ex vivo</i> stability experiments to minimize conversion.</li> </ul> | <ul style="list-style-type: none"> <li>Neither the number of sodium hydroxide pellets used per volume nor how quickly the pellets were added to the urine samples after collection were specified.</li> </ul>                                                        |

| Current Study                                                                                                                                                                                                                                                                                                                                                                                                                                                                                                                                                                                                                                                                                                                                                                                            | Zeng and Mitch 2016 <sup>4,5</sup>                                                                                                                                                                                                                                                                                                                                                                                                                                                                                                                                                          |
|----------------------------------------------------------------------------------------------------------------------------------------------------------------------------------------------------------------------------------------------------------------------------------------------------------------------------------------------------------------------------------------------------------------------------------------------------------------------------------------------------------------------------------------------------------------------------------------------------------------------------------------------------------------------------------------------------------------------------------------------------------------------------------------------------------|---------------------------------------------------------------------------------------------------------------------------------------------------------------------------------------------------------------------------------------------------------------------------------------------------------------------------------------------------------------------------------------------------------------------------------------------------------------------------------------------------------------------------------------------------------------------------------------------|
| <b>Bioanalytical Methods</b>                                                                                                                                                                                                                                                                                                                                                                                                                                                                                                                                                                                                                                                                                                                                                                             |                                                                                                                                                                                                                                                                                                                                                                                                                                                                                                                                                                                             |
| <ul style="list-style-type: none"> <li>• Sample analysis utilized liquid chromatography-mass spectrometry/mass spectrometry (LC-MS/MS) for all analytes (NDMA, DMA, and ranitidine).</li> <li>• Used direct quantitative methods and specific and selective LC-MS/MS detection for determining NDMA concentration.<sup>6</sup></li> </ul>                                                                                                                                                                                                                                                                                                                                                                                                                                                                | <ul style="list-style-type: none"> <li>• NDMA sample analysis utilized gas chromatography/ion trap mass spectrometry (GS/ITMS).</li> <li>• DMA and ranitidine sample analysis utilized liquid chromatography/mass spectrometry (LC-MS/MS).</li> <li>• Used an indirect derivatization method for NDMA analysis (<i>N,N</i>-dimethyl-2,3,4,5,6-pentafluorobenzamide quantified).</li> </ul>                                                                                                                                                                                                  |
| <b>Study Findings</b>                                                                                                                                                                                                                                                                                                                                                                                                                                                                                                                                                                                                                                                                                                                                                                                    |                                                                                                                                                                                                                                                                                                                                                                                                                                                                                                                                                                                             |
| <ul style="list-style-type: none"> <li>• Median (interquartile range [IQR]) 24-hr urinary excretion of NDMA with the noncured-meats diet was 0.6 ng (IQR, 0 to 29.7) for ranitidine compared to 10.5 ng (IQR, 0 to 17.8) for placebo.</li> <li>• With the cured-meats diet, 24-hr urinary excretion of NDMA was 11.9 ng (IQR, 5.6 to 48.6) with ranitidine compared to 23.4 ng (IQR, 8.6 to 36.7) for placebo.</li> <li>• With the noncured-meats diet, the geometric mean 24-hour urinary excretion of DMA was 38.8 mg (coefficient of variation [CV], 38%) for ranitidine compared to 41.1 mg (CV, 33%) for placebo.</li> <li>• With cured-meats diet, the geometric mean 24-hour urinary excretion of DMA was 40.7 mg (CV, 52%) with ranitidine compared to 43.1 mg (CV, 34%) for placebo.</li> </ul> | <ul style="list-style-type: none"> <li>• Following ranitidine intake, the urinary NDMA excreted over 24-hr increased 400-fold from 110 ng to 47,600 ng.</li> <li>• 24-hour urinary excretion of DMA was <math>9.7 \pm 2.8</math> mg prior to ranitidine intake and <math>24.9 \pm 5.2</math> mg after 150 mg ranitidine. This difference (approximately 13.4 mg higher after ranitidine) would account for 93.4 mg of the ranitidine product on a per mole basis.</li> </ul>                                                                                                                |
| <ul style="list-style-type: none"> <li>• After ranitidine intake, the 24-hour urinary excretion was 29% and 39% of the 300 mg dose when taken with the noncured-meats and cured-meats diet, respectively.</li> </ul>                                                                                                                                                                                                                                                                                                                                                                                                                                                                                                                                                                                     | <ul style="list-style-type: none"> <li>• After ranitidine intake, the 24-h excreted mass of ranitidine accounted for <math>33 \pm 12\%</math> of the 150 mg dose.</li> </ul>                                                                                                                                                                                                                                                                                                                                                                                                                |
| <ul style="list-style-type: none"> <li>• The total amount of ranitidine in urine from all sources, when accounting for 50% bioavailability, does not exceed the total ranitidine dose administered.</li> </ul>                                                                                                                                                                                                                                                                                                                                                                                                                                                                                                                                                                                           | <ul style="list-style-type: none"> <li>• The detected amount of ranitidine and DMA in urine accounted for 143.4 mg of the 150 mg ranitidine dose (note that each ranitidine molecule only has one DMA group, which has a lower molar mass than ranitidine). Ranitidine metabolites (ranitidine N-oxide, ranitidine S-oxide, and desmethyl ranitidine) accounted for approximately 9.4% (14.1 mg) of the 150 mg ranitidine dose in urine. These totals exceed the total amount of ranitidine administered. In addition, oral ranitidine only has 50% bioavailability.<sup>7</sup></li> </ul> |



**eFigure 1. Individual participant cumulative 24-hr urine excretion profiles of NDMA by group**

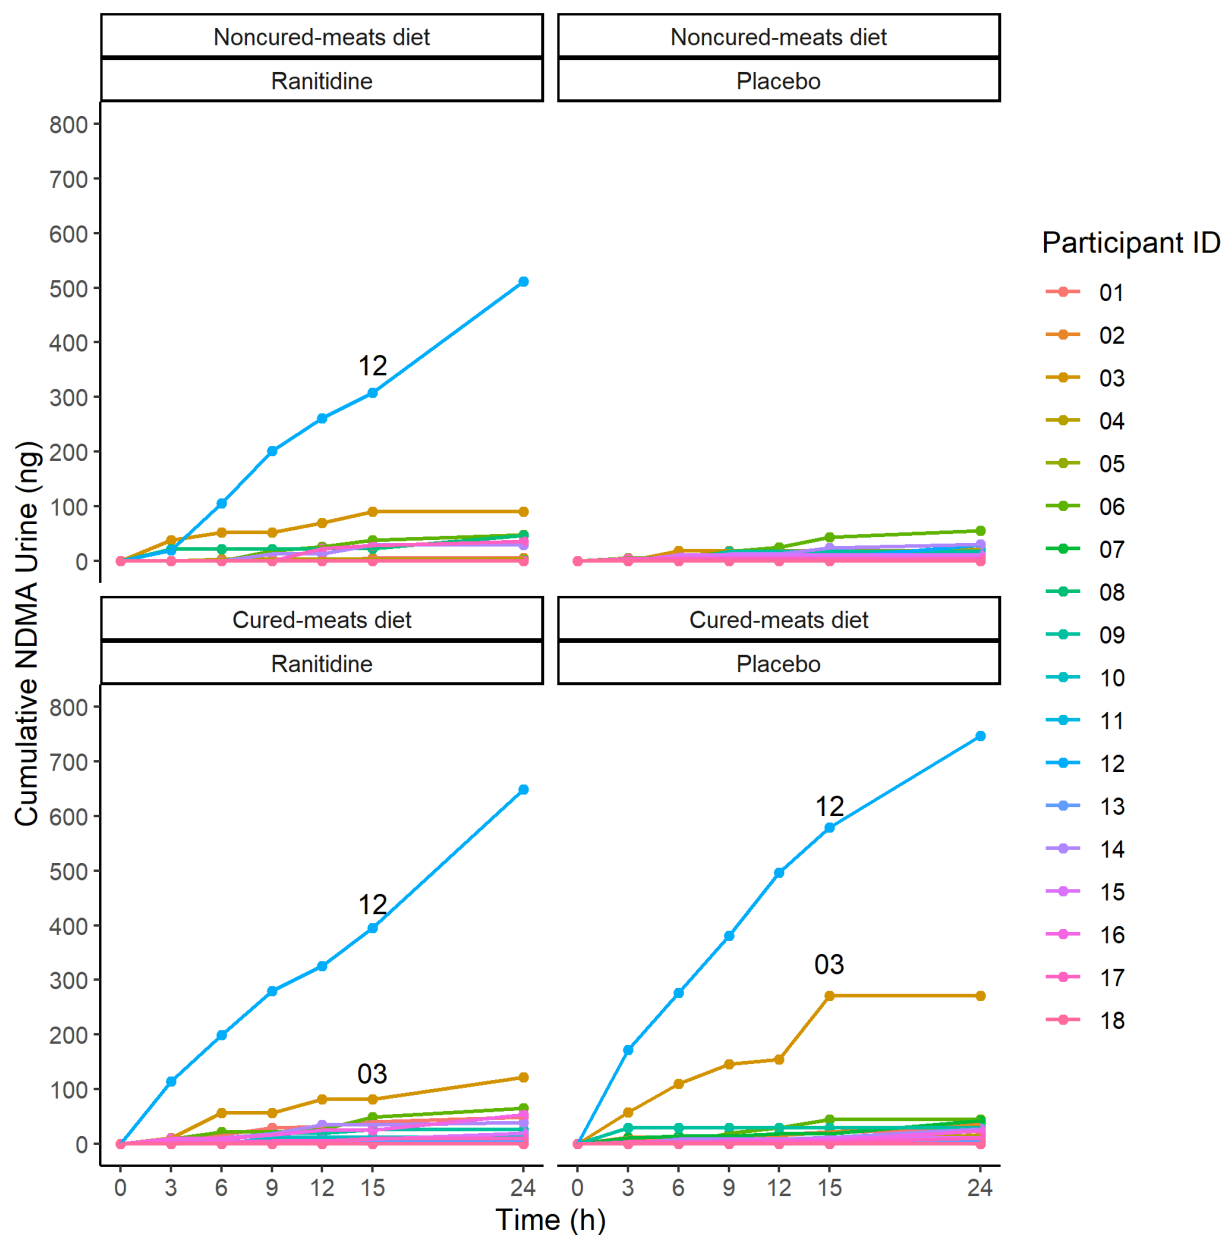

Cumulative NDMA 24-hr urine excretion profiles for each participant by group. Profiles for participant 03 and 12 where cumulative NDMA amounts exceeded 100 ng are labeled on the plot. Additional information on participant 12, including observations from the clinical site, are summarized in eTable 6.

eFigure 2. Arithmetic mean NDMA plasma concentration over time by group

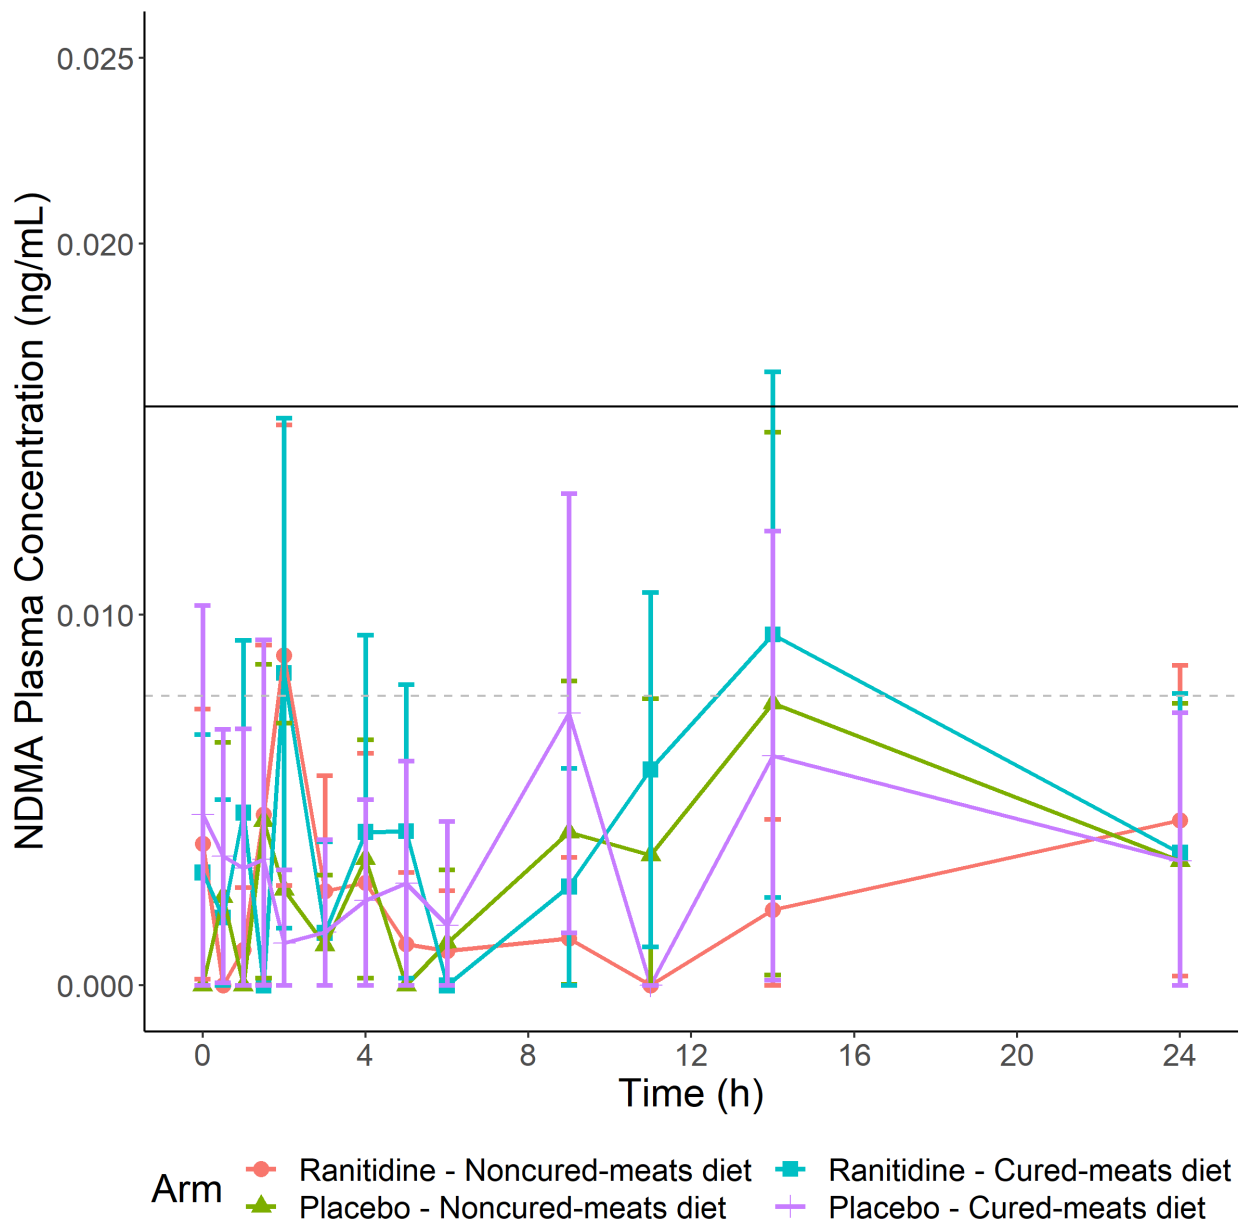

Arithmetic mean (90% confidence interval) NDMA plasma concentration over time by group. The lower limit of quantitation (LLOQ) for NDMA in plasma was 0.0156 ng/mL (horizontal black line). The lower limit of detection for NDMA was 0.0078 ng/mL (horizontal gray dashed line).

**eFigure 3. Individual participant NDMA plasma concentration profiles by group**

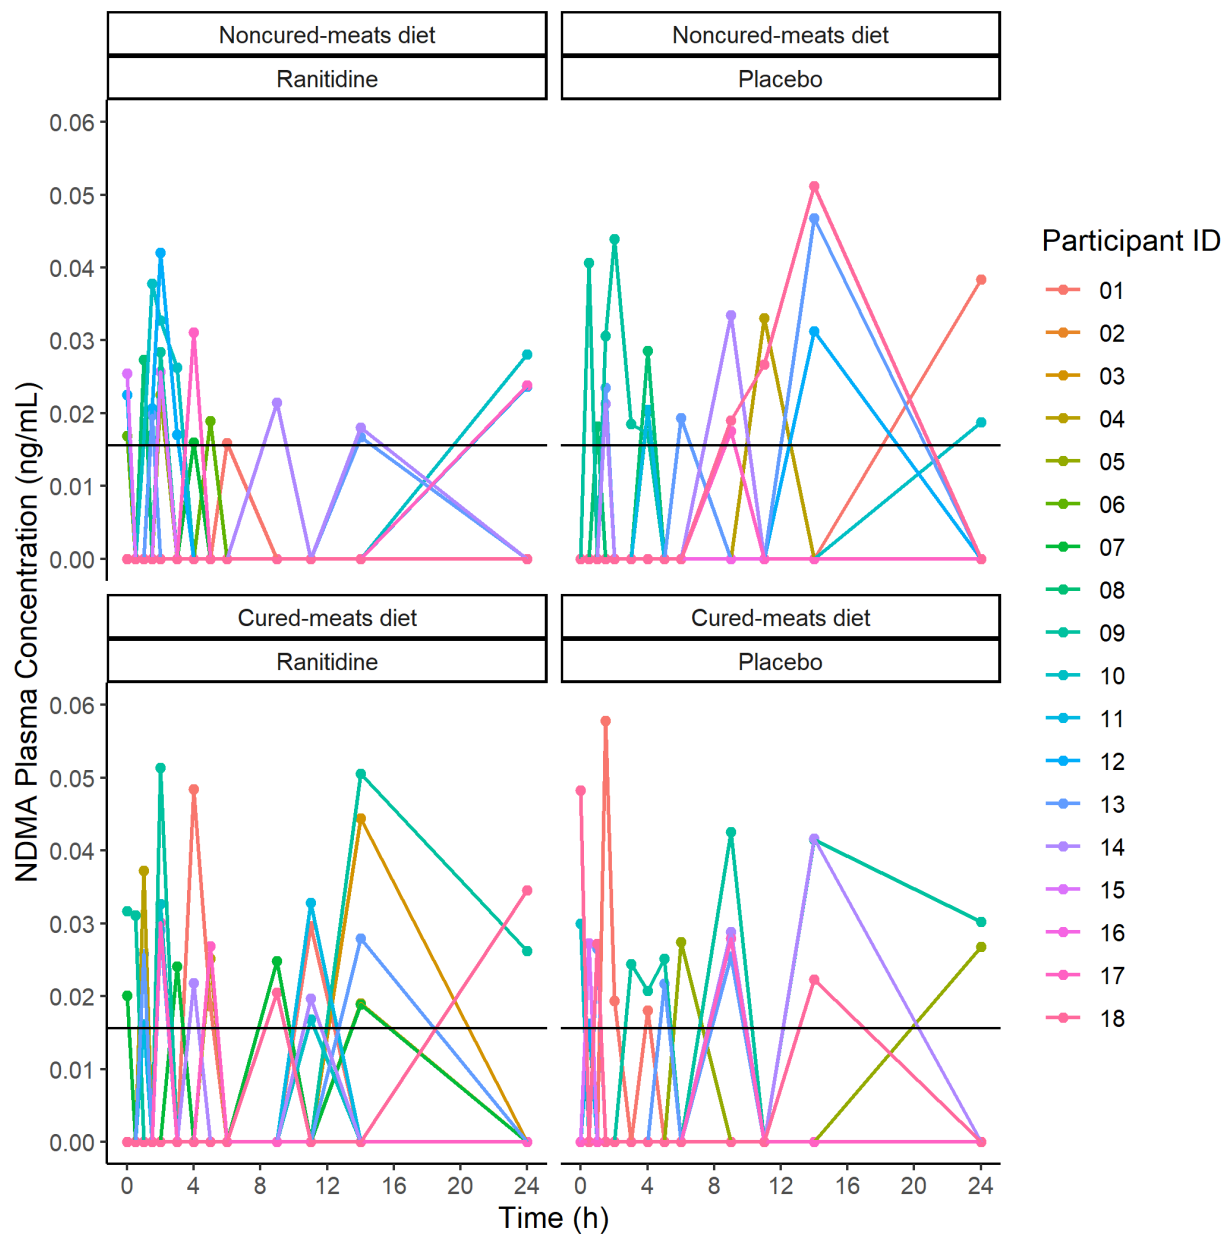

NDMA plasma pharmacokinetic profile for each participant grouped by group. The lower limit of quantitation (LLOQ) for NDMA in plasma was 0.0156 pg/mL (horizontal black line). Values below the LLOQ were set to 0 for plotting.

**eFigure 4. Cumulative DMA excreted in urine over 24-hours on a linear scale and DMA plasma concentration on a log scale by group**

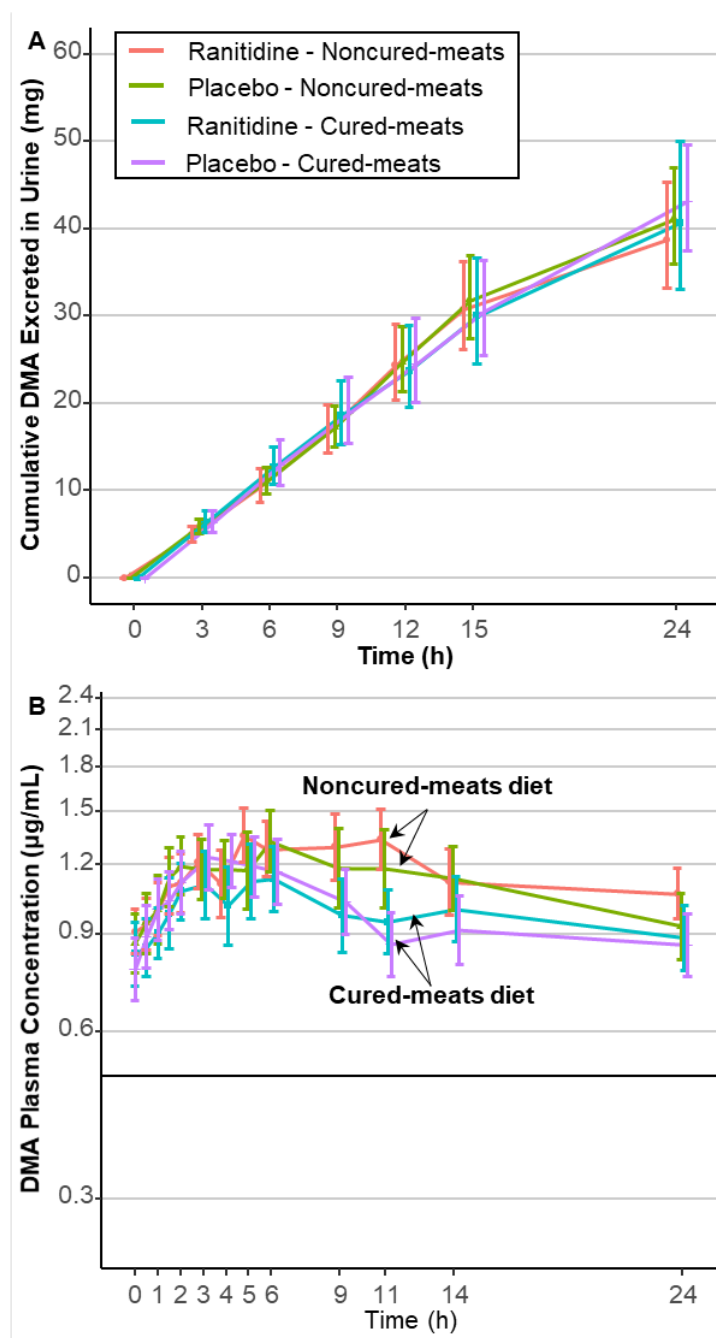

Data presented in panels A and B are the cumulative DMA excreted in urine over 24-hours and the DMA plasma concentration, respectively, for each of the four groups. Each point with accompanying error bars represents the geometric mean with 90% confidence intervals. Each data point in panel A is calculated as the cumulative amount of DMA that was excreted in urine up to that time point. Panel A is shown on a linear scale and panel B is shown on a log-scale. The lower limit of quantification for DMA was 0.500  $\mu\text{g/mL}$  and is shown on panel B as a horizontal black line.

**eFigure 5. Individual participant cumulative 24-hr urine excretion profiles of DMA by group**

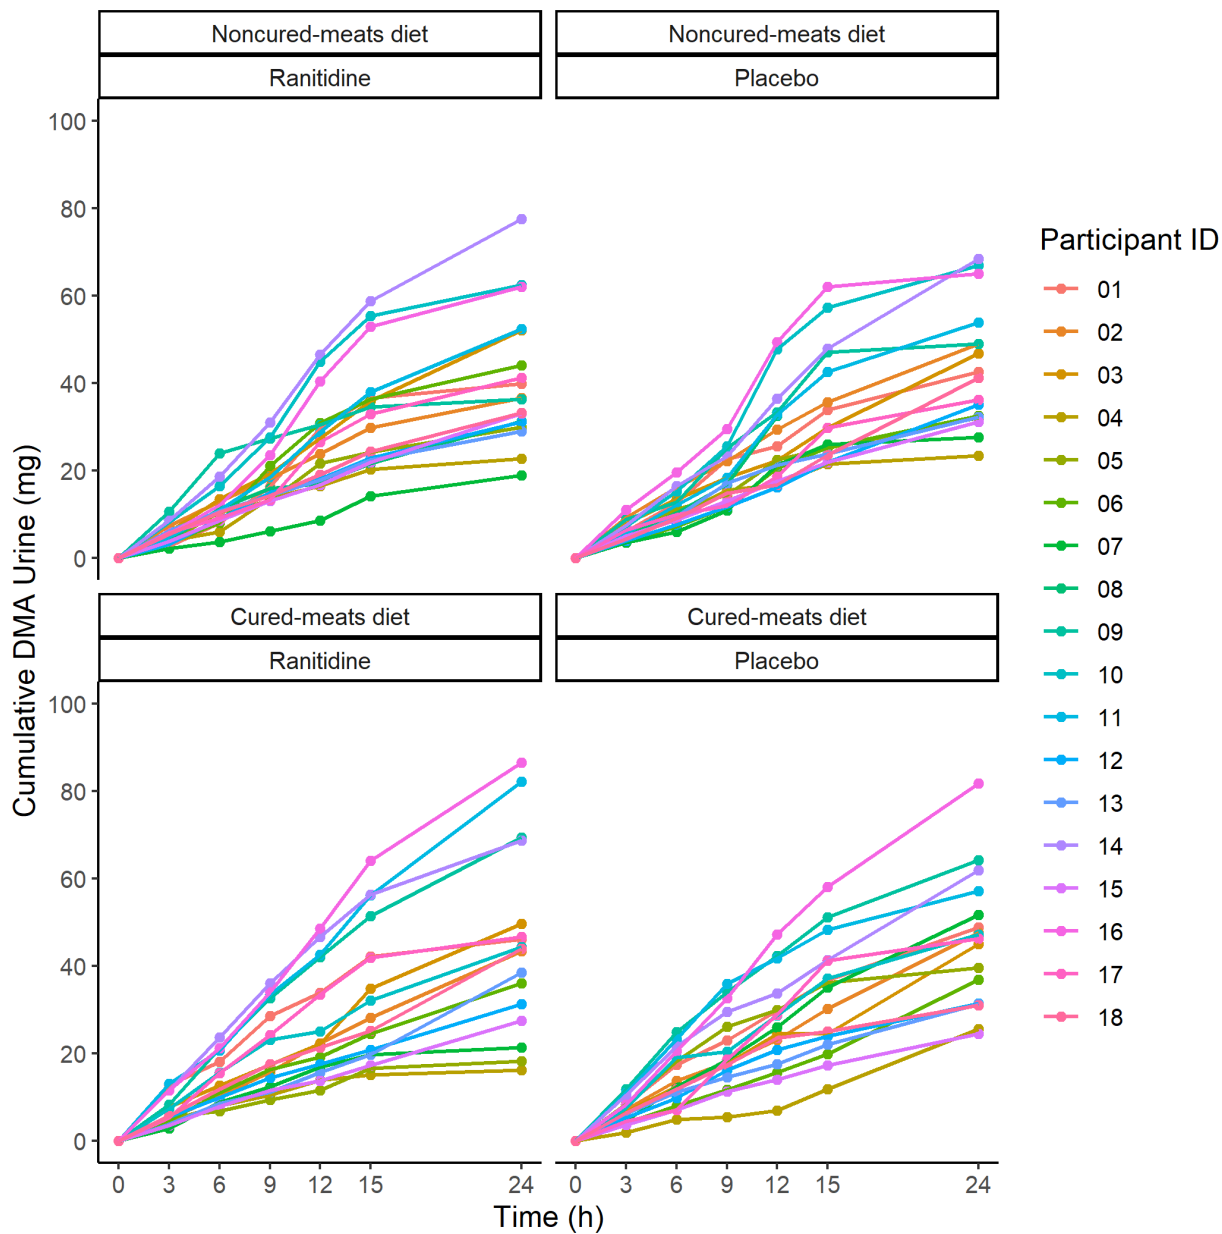

Cumulative DMA 24-hr urine excretion profiles for each participant by group.

**eFigure 6. Individual participant DMA plasma concentration profiles by group**

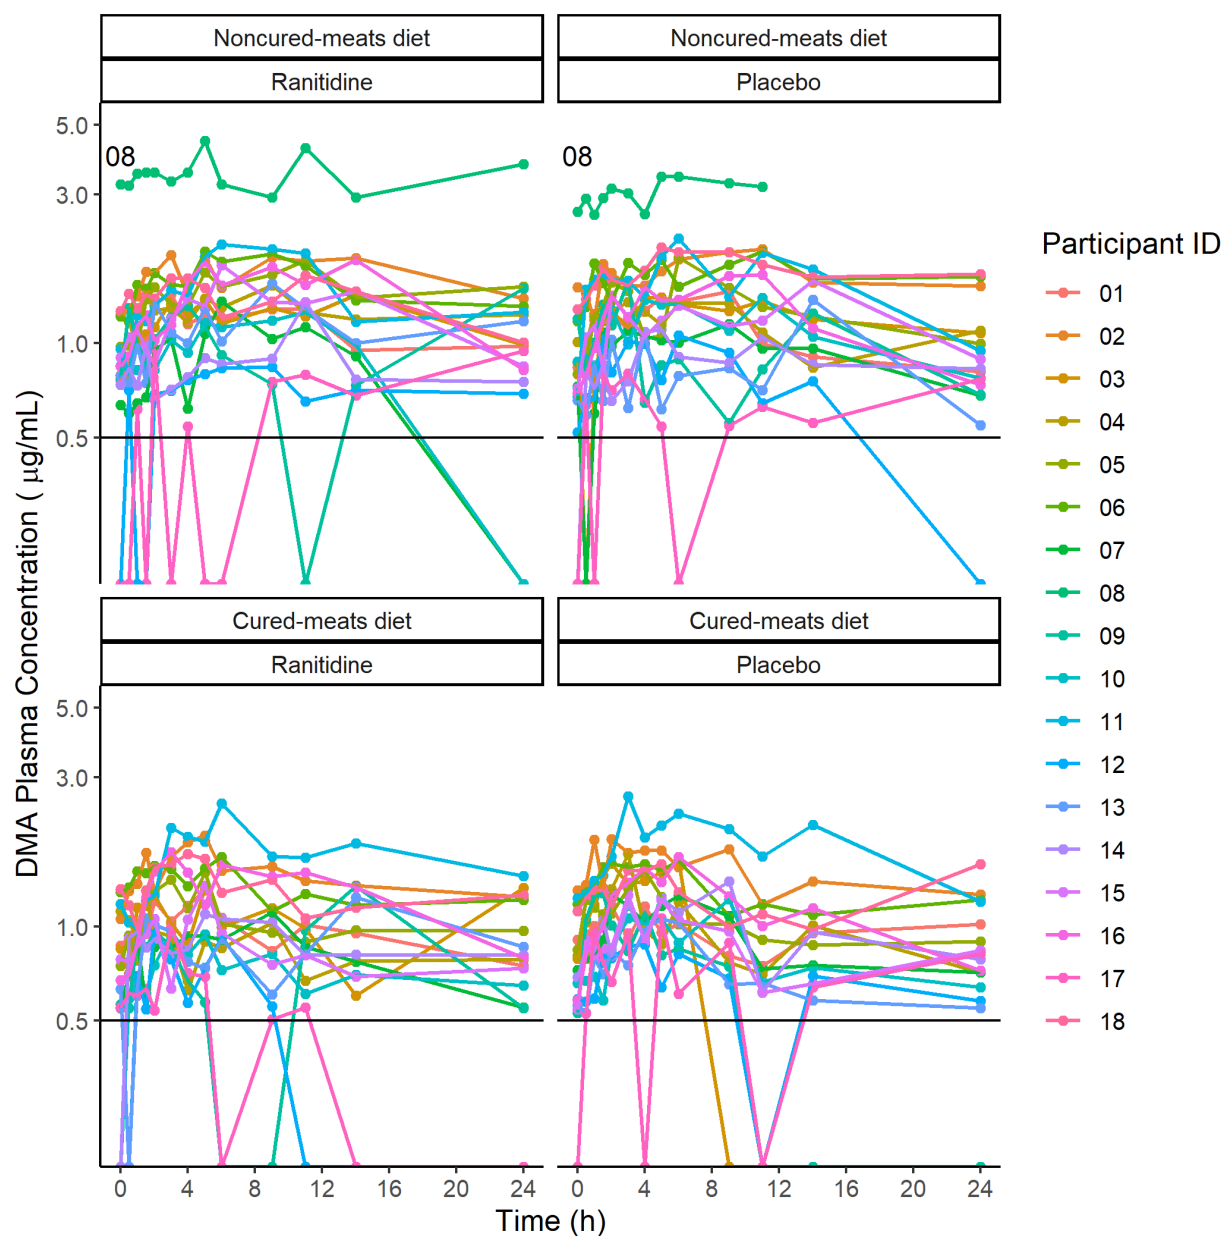

DMA plasma pharmacokinetic profile for each participant by group on a log scale. The lower limit of quantitation (LLOQ) for DMA in plasma was 0.50  $\mu\text{g/mL}$  (horizontal black line). Values below the LLOQ were plotted on the x-axis. Profiles for participant 08, who discontinued during period 2, are labeled on the plot.

**eFigure 7. 24-hour urinary excretion and maximum plasma concentration of ranitidine by group**

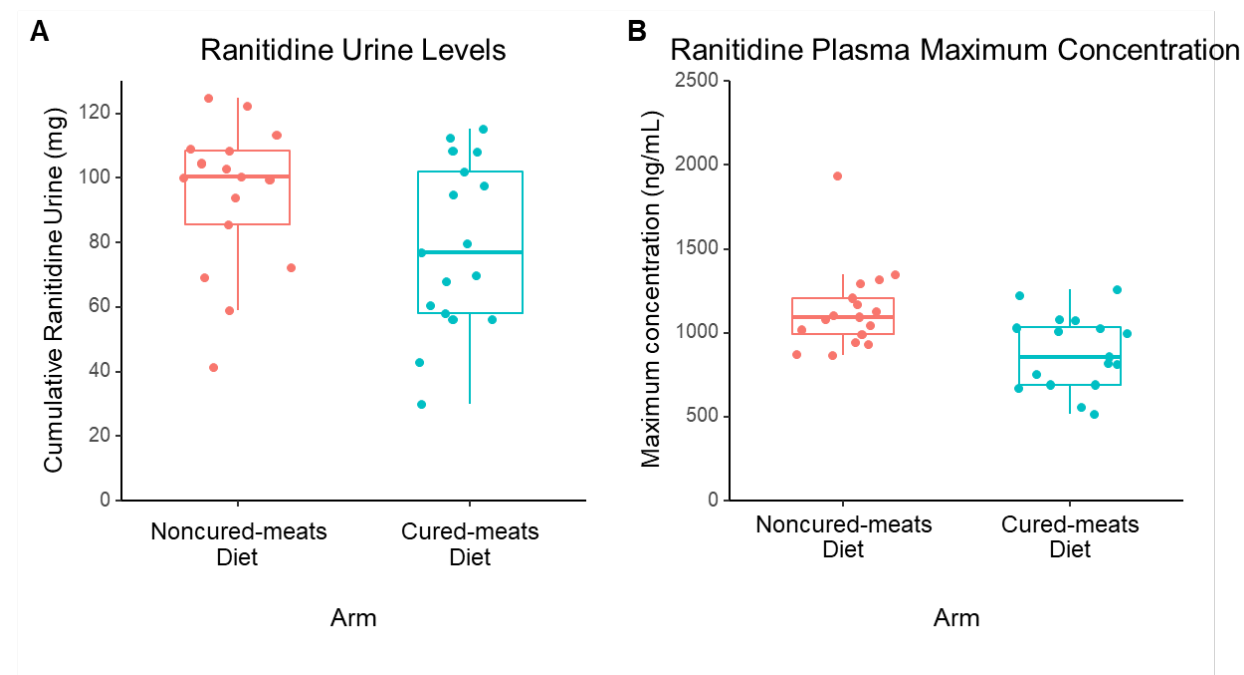

Individual-participant observed data (n=17) and box-and-whisker plot summaries. Panels A and B contain ranitidine 24-hour urinary excretion and maximum plasma concentration data from each of the four groups. The line through the box represents the median. The lower and upper borders of the box represent the 25<sup>th</sup> and 75<sup>th</sup> percentile, respectively. The whisker extends from the box border to the last observation within 1.5 times the interquartile range.

**eFigure 8. Geometric mean ranitidine 24-hour urinary excretion by diet**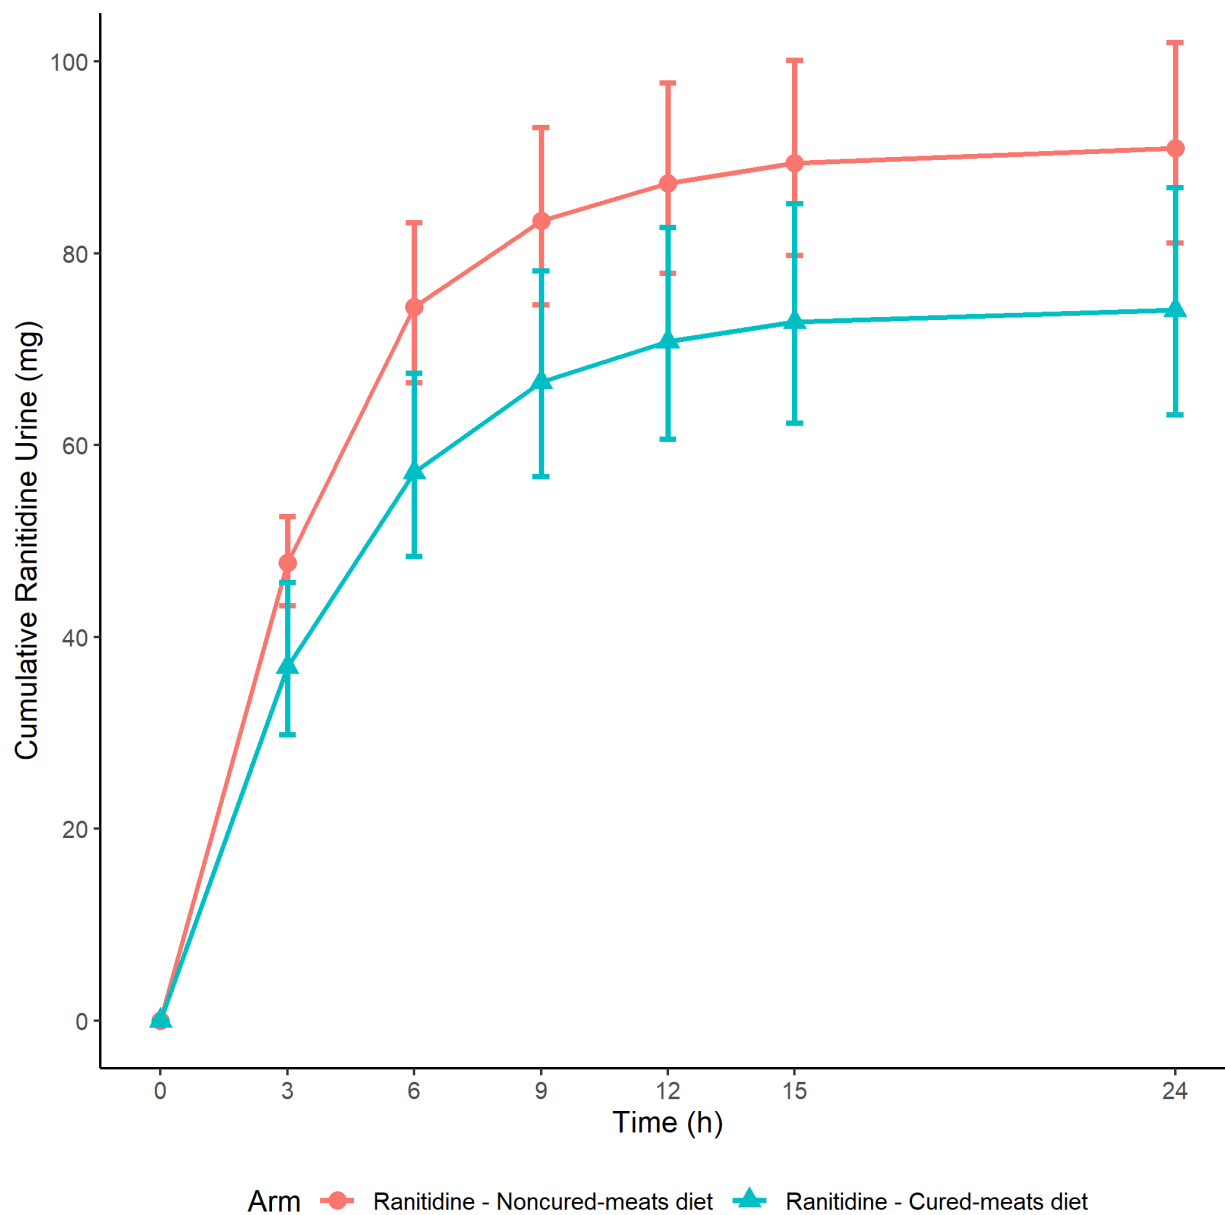

Geometric mean (90% confidence interval) ranitidine 24-hour urinary excretion over time by diet. Only two of the groups included ranitidine for determining cumulative ranitidine excretion.



**eFigure 9. Geometric mean ranitidine plasma concentration over time by diet**

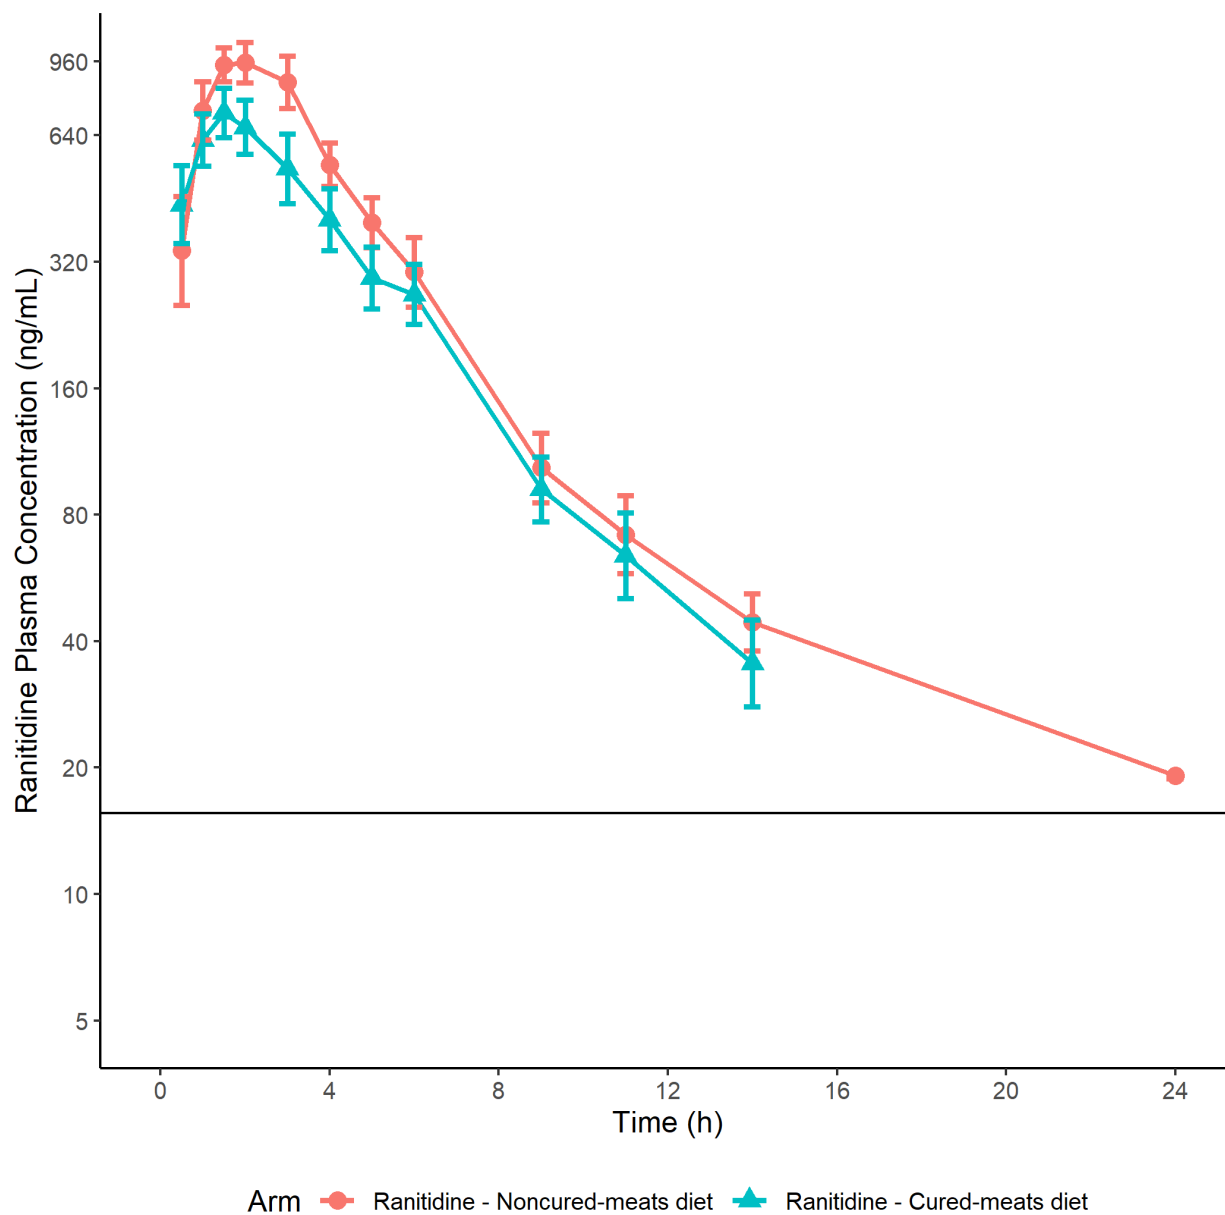

Geometric mean (90% confidence interval) ranitidine plasma concentration over time by diet on a log scale. Only two of the treatment groups included ranitidine for determining plasma concentration. The lower limit of quantitation (LLOQ) for ranitidine in plasma was 15.6 ng/mL (horizontal black line).

**eFigure 10. Individual participant cumulative 24-hr urine excretion profiles of ranitidine by diet**

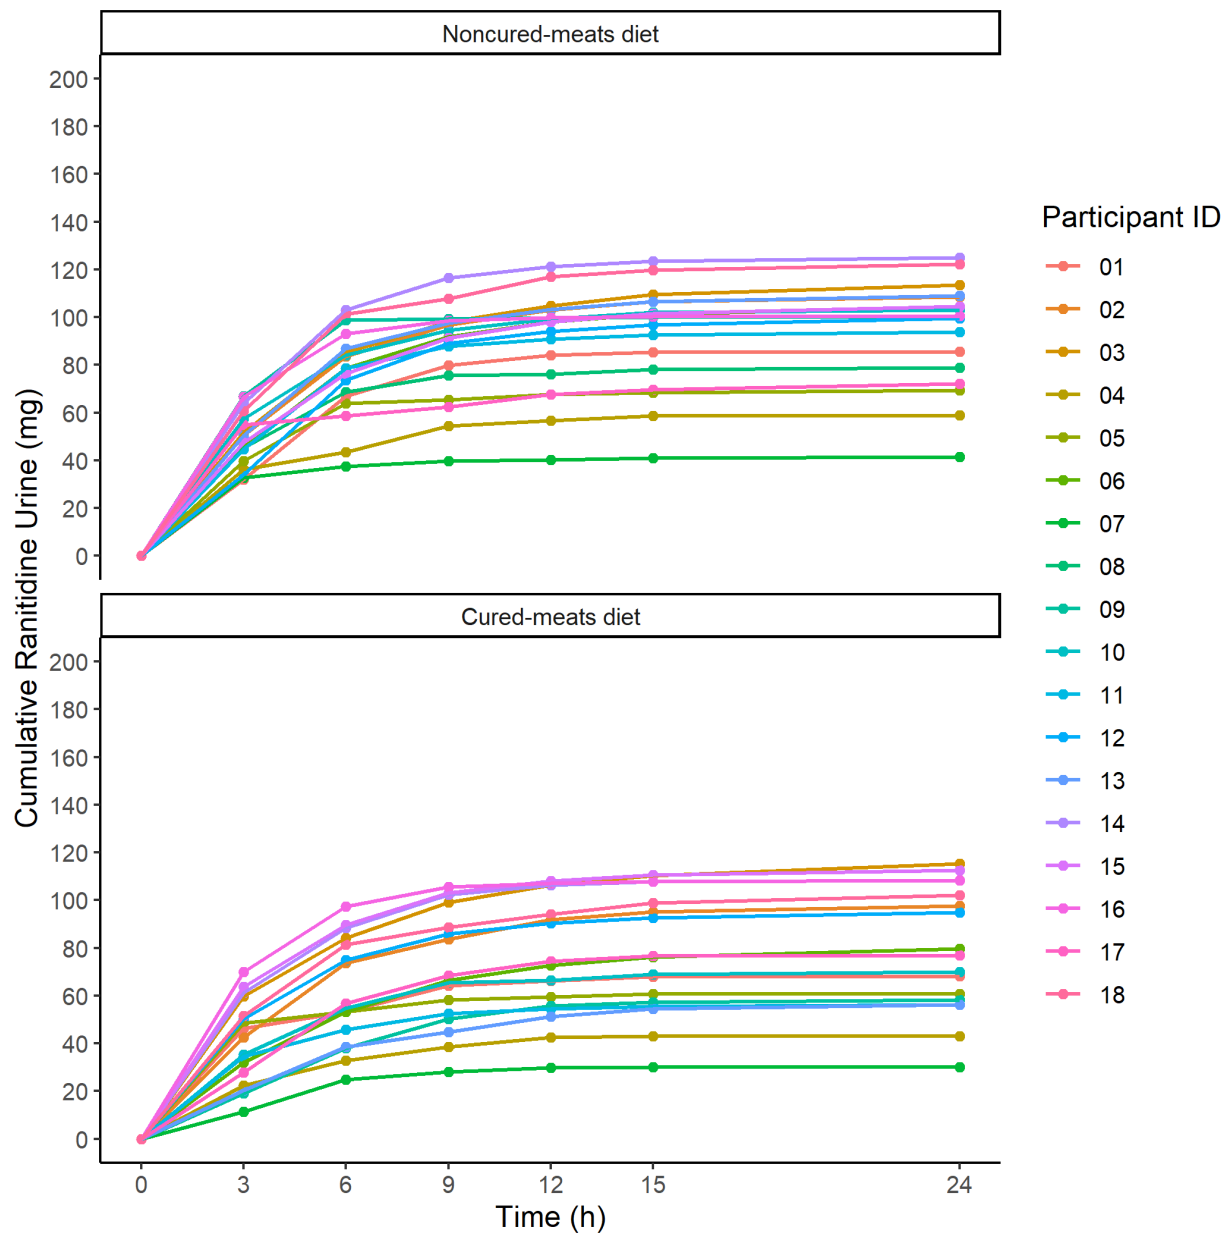

Cumulative ranitidine 24-hr urine excretion profiles for each participant grouped by treatment. Only two treatment groups (ranitidine/noncured-meats diet and ranitidine/cured-meats diet) contained ranitidine for calculating urine excretion time course.

**eFigure 11. Individual participant ranitidine plasma concentration profiles by diet**

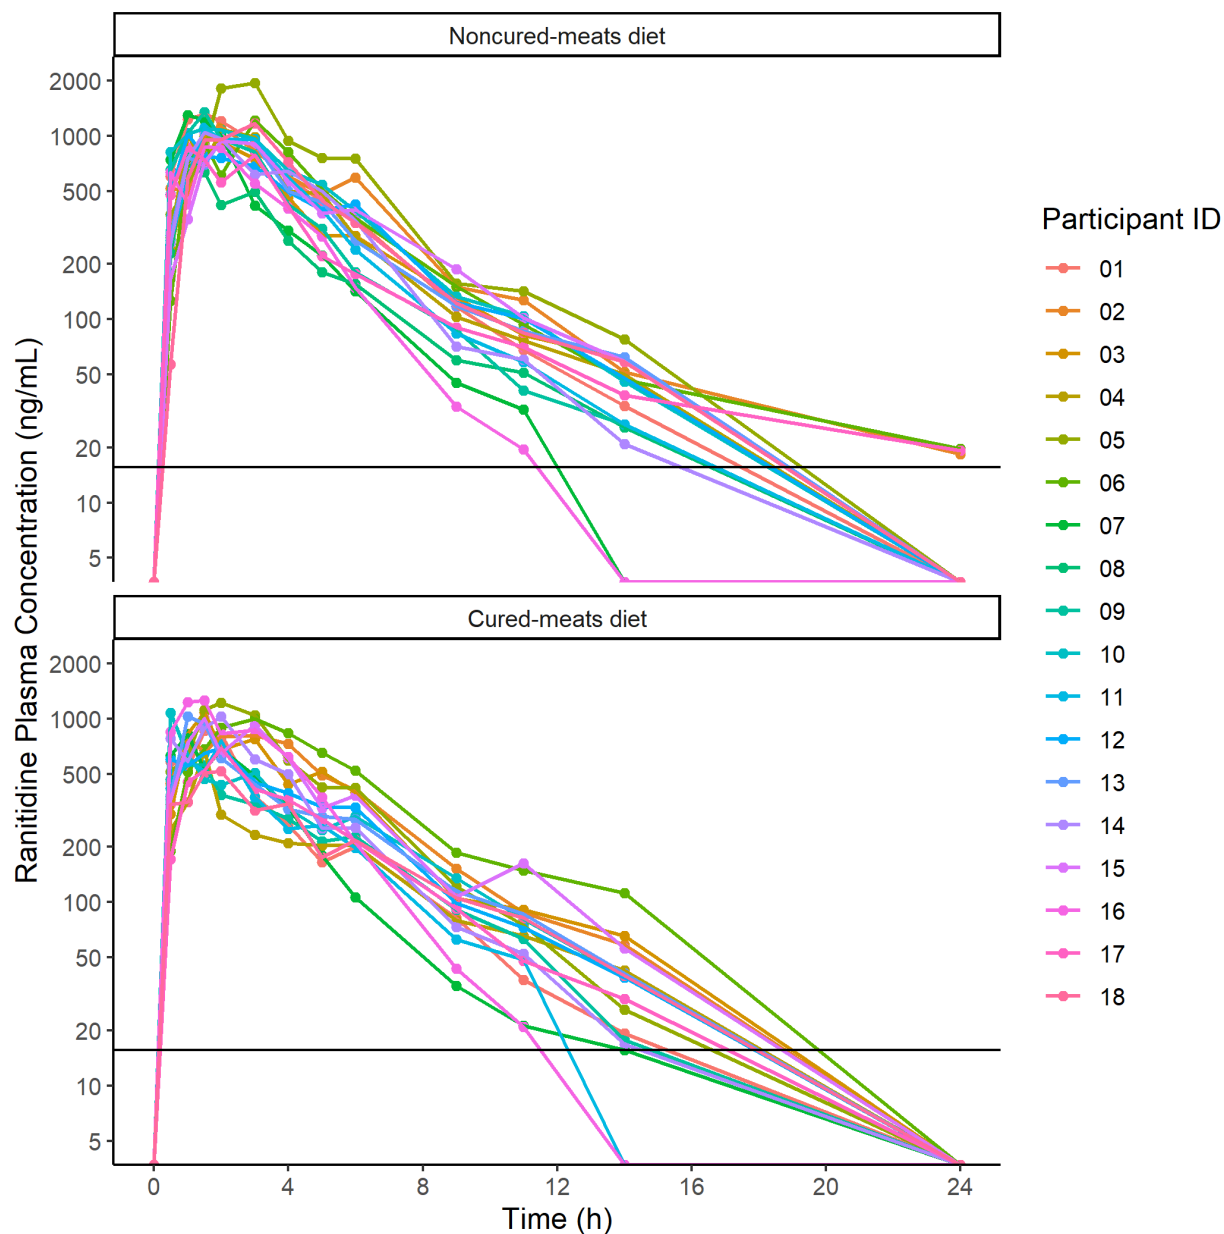

Ranitidine plasma pharmacokinetic profile for each participant by diet on a log scale. The lower limit of quantitation (LLOQ) for ranitidine in plasma was 15.6 ng/mL (horizontal black line). Values below the LLOQ were set to 0 ng/mL for plotting.

## **eMethods 1. Selection of Meals for Study and Full Menu Listing**

This randomized, placebo-controlled, crossover study included periods where participants were fed diets containing foods associated with higher or lower nitrite, nitrate, and NDMA content. As nitrites can be produced endogenously from nitrates, considerations were made, when possible, to select items associated with higher or lower nitrate content within each diet. The diets are referred to as noncured meats and cured meats diets.

All participants received identical standardized meals from check-in (day -2) to check out (day 9). The first two periods (noncured-meats diet) included the same standardized set of meals for the pretreatment and treatment days. Likewise, the last two periods (cured-meats diet) had a separate set of standardized meals for the pretreatment and treatment days. The order of periods for the noncured-meats and cured-meats diets was not randomized (i.e., noncured-meats diets were always served in the first two periods) to reduce potential differences in nitrite, nitrate, and NDMA content from needing to repurchase the same fresh ingredients.

In designing noncured-meats and cured-meats diets for this study, the following steps were taken to reduce overall variability:

- To standardize exposure to nitrites, nitrates, and NDMA, participants were introduced to the standardized diet from the date of check-in (day -2). They were only allowed to eat and drink what was given to them and were encouraged to finish all meals. Leftover food was photographed, and details were noted.
- As NDMA and nitrites are found in drinking water, participants were given distilled water to drink throughout the study. The only exception being during the cured-meats diet where participants were given tap water to drink to increase dietary intake of NDMA and nitrites in that group.
- Only organic vegetable and salad ingredients (as nitrate containing fertilizers are not used in organic farming) were used in noncured-meats diet and opposite was true for the cured-meats diet.
- Only cured meats (as nitrates/nitrites are used in the curing process) were used in cured-meats diet and the opposite was true for the noncured-meats diet.
- To maximize the intake of NDMA, nitrites, and nitrates in the cured-meats diet periods, participants were given generous servings of cured meats with every meal and snack.
- For both the cured-meats and noncured-meats diets all the food items were purchased or made together to avoid batch-to-batch variation in nitrites, nitrates, and NDMA in foods.

Food and drinks were chosen for the noncured-meats and cured-meats diet based on the available literature data (Table 1). A complete study menu used to inform foods chosen for the meals is shown below in Table 2.

**eMethods 1 - Table 1. Literature references of nitrite, nitrate and NDMA content across study meal items**

| Item                                                                             | Nitrites (ug/g)                   |                                     | Ref            | Nitrates (ug/g)                              |                                                            | Ref                  | NDMA (ug/kg) |                        | Ref      |
|----------------------------------------------------------------------------------|-----------------------------------|-------------------------------------|----------------|----------------------------------------------|------------------------------------------------------------|----------------------|--------------|------------------------|----------|
|                                                                                  | Mean                              | Range                               |                | Mean                                         | Range                                                      |                      | Mean         | Range                  |          |
| <b>Category: Cured Meat</b>                                                      |                                   |                                     |                |                                              |                                                            |                      |              |                        |          |
| <b>Sausage Links</b>                                                             | 10.4 <sup>a,b</sup><br>30         | 0.4-29.3 <sup>a,b</sup><br><10-61   | 8<br>9         | 77.4 <sup>a,b</sup><br>56                    | 0.81-540.8 <sup>a,b</sup><br><5-160                        | 8<br>9               | 0.4          | 0.31-1.5<br><0.15-0.4  | 10<br>9  |
| <b>Salami</b>                                                                    | 108                               |                                     | 11             | 142.5<br>98.5                                | 108.9-178.8                                                | 12<br>11             |              | 0.04-2.1               | 10       |
| <b>Pepperoni</b>                                                                 | 0.13 <sup>a,b</sup>               | 0.05-0.36 <sup>a,b</sup>            | 8              | 51.8 <sup>a,b</sup>                          | 1.7-250.9 <sup>a,b</sup>                                   | 8                    |              |                        |          |
| <b>Ham</b>                                                                       | 8.9<br>34.2<br>29                 | 28.7-39.7<br><10-43                 | 13<br>12<br>9  | 9<br>19<br>50                                | 10.9-27.1<br><5-98                                         | 13<br>12<br>9        | 2.3          | 0.18-0.23<br><0.15-3.1 | 10<br>9  |
| <b>Bacon</b>                                                                     | 3.8<br>15.7<br>7.4 <sup>a,b</sup> | 1.2-30.2<br>3.7-13.0 <sup>a,b</sup> | 13<br>12<br>8  | 55<br>23.3<br>15.4 <sup>a,b</sup>            | 15.1-31.5<br>3.4-24.4 <sup>a,b</sup>                       | 13<br>12<br>8        |              | 0.67-0.78              | 10       |
| <b>Corned Beef</b>                                                               | 7.8 <sup>a,b</sup>                | 0.27-22.4 <sup>a,b</sup>            | 8              | 17.4 <sup>a,b</sup>                          | 0.25-107.8 <sup>a,b</sup>                                  | 8                    |              |                        |          |
| <b>Hot Dog</b>                                                                   | 0.5<br>78.6<br>27.1               | 62.2-85                             | 13<br>12<br>14 | 90<br>69.9<br>257                            | 58.6-81.2                                                  | 13<br>12<br>14       | 2.8          |                        | 14       |
| <b>Category: Noncured Meat</b>                                                   |                                   |                                     |                |                                              |                                                            |                      |              |                        |          |
| <b>Roast Beef</b>                                                                | 0                                 |                                     | 15             | 13.2                                         | 10.8- 15.0                                                 | 15                   |              | 0-0.48                 | 10       |
| <b>Pork Chop</b>                                                                 | 0                                 |                                     | 15             | 11.6                                         | 10.2 -14.8                                                 | 15                   | 0            |                        | 10       |
| <b>Chicken Thighs</b>                                                            | 5.4                               |                                     | 14             | 6.6                                          |                                                            | 14                   | 0.97         | 0-0.52                 | 10<br>14 |
| <b>Category: Conventional Vegetables and Fruits (Given with Cured-Meat Diet)</b> |                                   |                                     |                |                                              |                                                            |                      |              |                        |          |
| <b>Spinach</b>                                                                   | 36.3 <sup>a</sup><br>0.2          | 0.04-137 <sup>a</sup>               | 8<br>13        | 647.3 <sup>a</sup><br>7410<br>4849.6<br>2797 | 161.5-875.4 <sup>a</sup>                                   | 8<br>13<br>12<br>16  |              | 0-6 <sup>c</sup>       | 10       |
| <b>Lettuce</b>                                                                   | 0.33 <sup>a</sup>                 | 0.12-0.62 <sup>a</sup>              | 8              | 206.9 <sup>a</sup><br>2720<br>1324<br>1074   | 79.4-424.5 <sup>a</sup><br>1410-4000<br>56-3660<br>21-3986 | 8<br>17<br>18<br>19  |              | 0-6 <sup>c</sup>       | 10       |
| <b>Tomatoes</b>                                                                  | 0.3<br>0.43                       |                                     | 13<br>14       | 392<br>36<br>15<br>43                        | 1-144                                                      | 13<br>20<br>21<br>18 |              | 0-6 <sup>c</sup>       | 10       |
| <b>Coleslaw Mix</b>                                                              | 0.7                               |                                     | 13             | 559                                          |                                                            | 13                   |              | 0-6 <sup>c</sup>       | 10       |
| <b>V8 Juice</b>                                                                  | 0.09                              |                                     | 13             | 26.17                                        |                                                            | 13                   |              |                        |          |
| <b>Cabbage</b>                                                                   | 0.27 <sup>a</sup>                 | 0.15-0.41 <sup>a</sup>              | 8              | 474.9 <sup>a</sup><br>311<br>881             | 255.5-669.7 <sup>a</sup><br>47-833<br>112-1864             | 8<br>18<br>19        |              | 0-6 <sup>c</sup>       | 10       |
| <b>Oranges (mandarin)</b>                                                        | 0.2<br>4.5                        | 2.1-6.9                             | 13<br>22       | 8<br>132                                     | 20-244                                                     | 13<br>22             |              | 0-6.2 <sup>c</sup>     | 10       |
| <b>Onion</b>                                                                     |                                   |                                     |                | 59<br>164                                    | 1-638                                                      | 20<br>18             |              | 0-6 <sup>c</sup>       | 10       |
| <b>Pomegranate Juice</b>                                                         | 0.06                              |                                     | 13             | 12.93                                        |                                                            | 13                   |              |                        |          |
| <b>Strawberries</b>                                                              | 0                                 |                                     | 19             | 94                                           | 9-360                                                      | 19                   |              | 0-6.2 <sup>c</sup>     | 10       |
| <b>Sport Pepper</b>                                                              |                                   |                                     |                | 41                                           | 0-92                                                       | 23                   |              | 0-0.42                 | 10       |
| <b>Pickles</b>                                                                   | 7.4                               | 3.6-11.2                            | 22             | 209<br>204                                   | 180-238<br>148.6-259.4                                     | 23<br>22             |              | 0-0.42                 | 10       |

| Item                                                                                                                                                                                                                              | Nitrites (ug/g)           |                        | Ref      | Nitrates (ug/g)                                           |                                                                            | Ref            | NDMA (ug/kg) |                      | Ref      |
|-----------------------------------------------------------------------------------------------------------------------------------------------------------------------------------------------------------------------------------|---------------------------|------------------------|----------|-----------------------------------------------------------|----------------------------------------------------------------------------|----------------|--------------|----------------------|----------|
|                                                                                                                                                                                                                                   | Mean                      | Range                  |          | Mean                                                      | Range                                                                      |                | Mean         | Range                |          |
| <b>Category: Organic Vegetables and Fruits (Given with Noncured-Meat Diet)</b>                                                                                                                                                    |                           |                        |          |                                                           |                                                                            |                |              |                      |          |
| Tomato                                                                                                                                                                                                                            | 0.3 <sup>d</sup>          |                        | 13       | 5<br>392 <sup>d</sup><br>43 <sup>d</sup>                  | 1-144 <sup>d</sup>                                                         | 21<br>13<br>18 |              | 0-6 <sup>c,d</sup>   | 10       |
| Iceberg Lettuce                                                                                                                                                                                                                   | 0.11 <sup>a</sup>         | 0.05-0.27 <sup>a</sup> | 8        | 100.1 <sup>a</sup><br>875 <sup>d</sup><br>48 <sup>d</sup> | 57.5-158.5 <sup>a</sup><br>210-1537 <sup>d</sup><br>17.8-78.2 <sup>d</sup> | 8<br>18<br>12  |              | 0-6 <sup>c,d</sup>   | 10       |
| Carrots                                                                                                                                                                                                                           | 0.39<br>0.06 <sup>d</sup> |                        | 24<br>13 | 29.4<br>1 <sup>d</sup>                                    |                                                                            | 24<br>13       |              | 0-6 <sup>c,d</sup>   | 10       |
| Tomato Soup                                                                                                                                                                                                                       |                           |                        |          | 8.7                                                       |                                                                            | 25             |              |                      |          |
| Orange                                                                                                                                                                                                                            | 0.2 <sup>d</sup>          |                        | 13       | 8 <sup>d</sup>                                            |                                                                            | 13             |              | 0-6.2 <sup>c,d</sup> | 10       |
| Mustard Greens                                                                                                                                                                                                                    | 0.03 <sup>d</sup>         |                        | 13       | 1160 <sup>d</sup>                                         |                                                                            | 13             |              | 0-6 <sup>c,d</sup>   | 10       |
| Banana                                                                                                                                                                                                                            | 0.09 <sup>d</sup>         |                        | 13       | 45 <sup>d</sup>                                           |                                                                            | 13             |              | 0-6.2 <sup>c,d</sup> | 10       |
| Apple Sauce                                                                                                                                                                                                                       | 0.08 <sup>d</sup>         |                        | 13       | 3 <sup>d</sup>                                            |                                                                            | 13             |              |                      |          |
| Kiwi                                                                                                                                                                                                                              |                           |                        |          | 0 <sup>d</sup>                                            |                                                                            | 20             |              | 0-6.2 <sup>c,d</sup> | 10       |
| Strawberry                                                                                                                                                                                                                        |                           |                        |          | 94 <sup>d</sup>                                           | 9-360 <sup>d</sup>                                                         | 19             |              | 0-6.2 <sup>c,d</sup> | 10       |
| Asparagus                                                                                                                                                                                                                         |                           |                        |          | 209 <sup>d</sup>                                          | 1-1459 <sup>d</sup>                                                        | 18             |              | 0-6 <sup>c,d</sup>   | 10       |
| Cucumbers                                                                                                                                                                                                                         | 0.2 <sup>d</sup>          | 0-0.8 <sup>d</sup>     | 19       | 93 <sup>d</sup>                                           | 4-245 <sup>d</sup>                                                         | 19             |              | 0-6 <sup>c,d</sup>   | 10       |
| <b>Category: Other Products</b>                                                                                                                                                                                                   |                           |                        |          |                                                           |                                                                            |                |              |                      |          |
| Cheese <sup>e</sup>                                                                                                                                                                                                               | 0.82<br>3.4               | 1.9-5.3                | 14<br>22 | 14.2<br>29.6                                              | 0-66.8                                                                     | 14<br>22       | 2.3          | 0-0.72               | 10<br>14 |
| Nuts <sup>e</sup>                                                                                                                                                                                                                 | 0.33                      |                        | 14       | 5.7                                                       |                                                                            | 14             | 0            |                      | 14       |
| Whole Milk <sup>e</sup>                                                                                                                                                                                                           | 0.004                     |                        | 14       | 0.86                                                      |                                                                            | 14             | 0.27         |                      | 14       |
| Bun <sup>e</sup>                                                                                                                                                                                                                  |                           | 0-0.4<br>0.6-7.2       | 26<br>22 |                                                           | 7.2-8<br>298-728                                                           | 26<br>22       |              | 0-0.98               | 10       |
| Sub Roll <sup>e</sup>                                                                                                                                                                                                             | 3.9                       | 0-0.4<br>0.6-7.2       | 26<br>22 | 513                                                       | 7.2-8<br>298-728                                                           | 26<br>22       |              | 0-0.98               | 10       |
| French Fries <sup>e</sup>                                                                                                                                                                                                         | 1.7<br>0.69               |                        | 13<br>14 | 20<br>37                                                  |                                                                            | 13<br>14       | 0            |                      | 14       |
| Ketchup <sup>e</sup>                                                                                                                                                                                                              | 1.3                       |                        | 13       | 1                                                         |                                                                            | 13             |              |                      |          |
| Vegetable Oil <sup>e</sup>                                                                                                                                                                                                        |                           |                        |          |                                                           |                                                                            |                |              | 0-2.3<br>1-23        | 10<br>27 |
| Almonds <sup>e</sup>                                                                                                                                                                                                              | 1.7                       | 1.5-1.9                | 22       | 285                                                       | 75-495                                                                     | 22             |              |                      |          |
| Feta Cheese <sup>e</sup>                                                                                                                                                                                                          | 0                         |                        | 28       | 3.5                                                       |                                                                            | 28             |              | 0-7                  | 29       |
| Milk 2%                                                                                                                                                                                                                           | 0.04                      |                        | 14       | 3.5                                                       |                                                                            | 14             | 0.85         |                      | 14       |
| Macaroni & Cheese                                                                                                                                                                                                                 | 0.18                      |                        | 25       | 4.8                                                       |                                                                            | 25             |              |                      |          |
| White Rice                                                                                                                                                                                                                        | 2.16                      |                        | 14       | 16.4                                                      |                                                                            | 14             |              |                      |          |
| Ice cream (vanilla)                                                                                                                                                                                                               | 0.12<br>0.5               |                        | 25<br>14 | 5<br>2.9                                                  |                                                                            | 25<br>14       |              | 0-0.28               | 10       |
| Cheddar Cheese                                                                                                                                                                                                                    | 0                         |                        | 28       | 3.5                                                       |                                                                            | 28             |              | 9-20                 | 29       |
| Provolone                                                                                                                                                                                                                         | 0                         |                        | 28       | 3.5                                                       |                                                                            | 28             | 9            |                      | 29       |
| Rice Cake                                                                                                                                                                                                                         |                           |                        |          |                                                           |                                                                            |                |              | 0-0.8                | 10       |
| White Bread <sup>f</sup>                                                                                                                                                                                                          |                           | 0-0.4                  | 26       |                                                           | 7.2-8                                                                      | 26             |              | 0-0.98               | 10       |
|                                                                                                                                                                                                                                   | 1.6<br>3.9                | 0.6-7.2                | 14<br>22 | 16.4<br>513                                               | 298-728                                                                    | 14<br>22       |              | 0.08                 | 14       |
| Eggs <sup>f</sup>                                                                                                                                                                                                                 |                           | 0.15-0.18              | 30       |                                                           | 5.1-5.5                                                                    | 30             |              |                      |          |
| Butter <sup>f</sup>                                                                                                                                                                                                               | 0                         |                        | 14       | 0                                                         |                                                                            | 14             | 0            |                      | 14       |
| Tap Water <sup>e</sup>                                                                                                                                                                                                            |                           |                        |          |                                                           | 0-3.5                                                                      | 8              |              | 0-0.02<br>0-0.02     | 31<br>32 |
| <b>Food Items without Literature References</b>                                                                                                                                                                                   |                           |                        |          |                                                           |                                                                            |                |              |                      |          |
| Beef Jerky, Relish, Horseradish, Orange Juice, Apple Juice, Mayonnaise <sup>e</sup> , Italian Dressing <sup>e</sup> , Coleslaw Dressing <sup>e</sup> , Vinegar <sup>e</sup> , Balsamic Vinaigrette <sup>e</sup> , Distilled water |                           |                        |          |                                                           |                                                                            |                |              |                      |          |

Ref: Reference

<sup>a</sup>Values obtained from Chicago region in Bryan et al, 2009<sup>8</sup> as the clinical study site of this study is in West Bend, WI (approximately 75 miles north of the Illinois/Wisconsin border and Chicago region)

<sup>b</sup>Also published by Nunez et al, 2012<sup>16</sup>

<sup>c</sup>General range given in Park et al, 2015<sup>10</sup> for all vegetables and fruits

<sup>d</sup>References do not specify whether the vegetables and fruits used for analysis were organic or conventional

<sup>e</sup>Given with cured-meats diet

<sup>f</sup>Common food items given in both cured-meat and non-cured meat diets

eMethods 1 - Table 2. Full menu listing<sup>a</sup>

| Day -2             |            | Noncured-meats diet <sup>b,c</sup> |            |                  |            | Cured-meats diet <sup>b,d</sup> |          |               |          |
|--------------------|------------|------------------------------------|------------|------------------|------------|---------------------------------|----------|---------------|----------|
|                    |            | Pre-dose Day                       |            | Dosing Day       |            | Pre-dose Day                    |          | Dosing Day    |          |
| Meal items         | Amount     | Meal items                         | Amount     | Meal items       | Amount     | Meal items                      | Amount   | Meal items    | Amount   |
| <b>Breakfast</b>   |            |                                    |            |                  |            |                                 |          |               |          |
| Honey Nut Cheerios | 1 oz       | Eggs (scrambled)                   | 2          | Eggs (scrambled) | 2          | Eggs (fried)                    | 2        | Eggs (fried)  | 2        |
| 2% Milk            | 8 oz       | Kiwi                               | ¼ cup      | Kiwi             | ¼ cup      | Vegetable oil                   | 1 tbsp   | Vegetable Oil | 1 tsp    |
| Apple Juice        | 6.75 fl oz | Strawberries                       | ¼ cup      | Strawberries     | ¼ cup      | Sausage links                   | 4        | Sausage Links | 4        |
|                    |            | White Bread                        | 2 slices   | White Bread      | 2 slices   | White Bread                     | 2 slices | White Bread   | 2 slices |
|                    |            | Butter                             | 1 tbsp     | Butter           | 2 tbsp     | Butter                          | 1 tbsp   | Butter        | 1 tbsp   |
|                    |            | Orange Juice                       | 8 fl oz    | Orange Juice     | 8 fl oz    | Whole Milk                      | 8 oz     | Whole Milk    | 8 fl oz  |
| <b>Lunch</b>       |            |                                    |            |                  |            |                                 |          |               |          |
| Flour Tortillas    | 2 (6 inch) | Macaroni & Cheese                  | 8 oz       | Roast Beef       | 4 oz       | Bacon                           | 6 strips | Salami        | 2 oz     |
| Chicken Breast     | 4 oz       | Apple Juice                        | 6.75 fl oz | White Bread      | 2 slices   | White Bread                     | 2 slices | Pepperoni     | 2 oz     |
| Monterey Cheese    | 4 oz       | Tomato Soup                        | 8 oz       | Tomatoes         | 2 slices   | Tomato                          | ¼ cup    | Ham           | 2 oz     |
| Enchilada Sauce    | 2 fl oz    |                                    |            | Iceberg Lettuce  | 1 cup      | Lettuce                         | 1 cup    | Bacon         | 2 oz     |
| Iceberg Lettuce    | 1 cup      |                                    |            | Horseradish      | ½ tsp      | Spinach                         | 1 ½ cup  | Sub Roll      | 1        |
| Corn               | ¼ cup      |                                    |            | Cheddar Cheese   | 1 slice    | Feta Cheese                     | ¼ cup    | Provolone     | 2 slices |
| Black Beans        | ¼ cup      |                                    |            | Carrots          | ½ cup      | Almonds                         | ¼ cup    | Spinach       | 1 cup    |
| Tomatoes           | ¼ cup      |                                    |            | Apple Juice      | 6.75 fl oz | Strawberries                    | ¼ cup    | Tomatoes      | 4 slices |
| Ranch              | 1 fl oz    |                                    |            |                  |            | Pomegranate Juice               | 8 oz     | Mayo          | 1 tbsp   |
| Vegetable oil      | 1 tsp      |                                    |            |                  |            | Balsamic Dressing               | 1 fl oz  | Coleslaw Mix  | 4 oz     |
| Lemon Lime Soda    | 8 fl oz    |                                    |            |                  |            |                                 |          | Coleslaw      | 1 tbsp   |
|                    |            |                                    |            |                  |            |                                 |          | Dressing      |          |
|                    |            |                                    |            |                  |            |                                 |          | V8 juice      | 8 fl oz  |
| <b>Dinner</b>      |            |                                    |            |                  |            |                                 |          |               |          |
| Meat balls         | 5 (1 oz)   | Chicken Thighs                     | 6 oz       | Pork Chop        | 5 oz       | Hot Dog (Jumbo/Large)           | 1        | Corned Beef   | 8 oz     |
| Potatoes           | 1 cup      | White Rice                         | 1 cup      | Asparagus        | ½ cup      | Bun                             | 1        | Cabbage       | 1 cup    |
| Gravy              | 2 fl oz    | Milk 2%                            | 8 fl oz    | Mustard Greens   | 1 ½ cup    | Onion                           | 1 tbsp   | Vinegar       | 1 tbsp   |
| Milk 2%            | 8 fl oz    |                                    |            | Tomatoes         | ¼ cup      | Relish                          | 1 tbsp   | Sugar         | 1 tbsp   |
|                    |            |                                    |            | Cucumbers        | ¼ cup      | Sport Pepper                    | 2        | Salt          | 1 tsp    |
|                    |            |                                    |            | Carrots          | ¼ cup      | Tomatoes                        | 2 wedges |               |          |
|                    |            |                                    |            | Apple sauce      | 1 cup      | Pickle                          | 1 spear  |               |          |
|                    |            |                                    |            | Milk 2%          | 8 fl oz    | Yellow Mustard                  | 0.2 oz   |               |          |
|                    |            |                                    |            | Butter           | 1 tsp      | French Fries                    | 1 oz     |               |          |
|                    |            |                                    |            |                  |            | Ketchup                         | 0.2 oz   |               |          |
|                    |            |                                    |            |                  |            | Salt                            | ½ tsp    |               |          |

| Day -2       |         | Non-cured meats diet |        |                        |        | Cured-meats diet |        |                       |        |
|--------------|---------|----------------------|--------|------------------------|--------|------------------|--------|-----------------------|--------|
|              |         | Pre-dose Day         |        | Dosing Day             |        | Pre-dose Day     |        | Dosing Day            |        |
| Meal items   | Amount  | Meal items           | Amount | Meal items             | Amount | Meal items       | Amount | Meal items            | Amount |
| <b>Snack</b> |         |                      |        |                        |        |                  |        |                       |        |
| Chex Mix     | 1.75 oz | Rice Cake            | 9 g    | Ice cream<br>(vanilla) | 4 oz   | Beef jerky       | 3 oz   | Spinach               | 1 cup  |
| Banana       | 1       | Banana               | 1      | Orange                 | 1      | Cheese           | 2 oz   | Strawberries          | ¼ cup  |
|              |         |                      |        |                        |        | Nuts             | 2 oz   | Oranges<br>(mandarin) | ¼ cup  |
|              |         |                      |        |                        |        |                  |        | Italian Dressing      | 1 oz   |
|              |         |                      |        |                        |        |                  |        | Beef jerky            | ¼ cup  |

fl oz: fluid ounces; g: grams; oz: ounces; tbsp: tablespoon; tsp: teaspoon

<sup>a</sup>Side-by-side listing of menu items from the noncured-meats/organic-vegetables and cured-meats/conventional-vegetables diet (referred to as noncured-meats and cured-meats diets, respectively)

<sup>b</sup>Distilled water was served throughout the study except tap water was served during meals on the cured-meats diet

<sup>c</sup>Organic vegetables and fruits were served with the noncured-meats diet

<sup>d</sup>Conventional vegetables and fruits were served with the cured-meats diet



## eMethods 2. Bioanalytical Methods for the Analytes and Biospecimens in the Clinical Study

Sample analysis utilized liquid chromatography-mass spectrometry/mass spectrometry (LC-MS/MS). All the assays were developed with the aim of high sensitivity with reliable quantitation. While optimizing the lower limit of quantitation (LLOQ) of each analyte, various parameters like signal to noise, accuracy, and precision were evaluated. The upper limit of quantitation (ULOQ) was selected based on the concentration at which acceptable linearity range was observed (*i.e.*, concentration vs linear detector response). The details of individual methods and validation parameters are described below. The present study used analytical methods that were validated per FDA's Bioanalytical Method Validation Guidance for Industry.<sup>6</sup>

### Bioanalytical Method Conditions for NDMA Urine Method

Validation range: 15.6–2000.0 pg/mL  
 High Performance Liquid Chromatography (HPLC) instrument: Agilent 1290 Infinity  
 Mass Spectrometer: AB SCIEX 6500+ Qtrap Mass spectrometer

#### HPLC Conditions

Mobile Phase: 10 mM ammonium formate with 0.1% formic acid in water and acetonitrile (Gradient flow)  
 Flow rate: 0.4 mL/min  
 Column: Kinetex Biphenyl 100 Å (2.1 x 50 mm) 5.0 µm  
 Injection Volume: 20 µL  
 Retention Time: NDMA: 1.12 minutes  
 NDMA-d<sub>6</sub>: 1.12 minutes  
 Run Time: 3.5 minutes

#### Mass Spectrometer conditions

Ionization Source and scan type: Atmospheric Pressure Chemical Ionization (APCI)  
 Multiple Reaction Monitoring (MRM)  
 Data acquisition: Analyst 1.7.1

AB SCIEX 6500+ Q-TRAP mass spectrometer state file parameters:

| Parameter                     | Positive mode |                     |
|-------------------------------|---------------|---------------------|
|                               | NDMA          | NDMA-d <sub>6</sub> |
| Q1 mass/Q3 mass (amu)         | 75.1/43.1     | 81/46               |
| Collision Energy (V)          | 19            | 21                  |
| Declustering Potential        | 90            | 60                  |
| Entrance Potential            | 10            | 8                   |
| Collision Cell Exit Potential | 10            | 10                  |
| Source Temperature (°C):      | 350           | 350                 |
| Ion Source Gas 1              | 90            | 90                  |
| Curtain Gas Flow              | 30            | 30                  |
| Collision Gas Flow            | 8             | 8                   |
| Nebulizer Current             | 5             | 5                   |
| Dwell time (ms)               | 150           | 150                 |

**Sample Preparation:** Sample preparation involved the extraction of NDMA from the samples using liquid-liquid extraction (LLE). First, 2.0 mL of surrogate/urine sample (calibration control [CC] or quality control [QC]) and 10 µl of internal standard (100.0 ng/mL of NDMA-d<sub>6</sub> in 10mM ammonium formate with 0.1% formic acid) were mixed. After vortexing, 150 µl of extraction additive (1N NaOH) was added. Later, 3 ml of MTBE (methyl tert-butyl ether) was added to each sample followed by 30 minutes of vigorous mixing at 2500 rpm for 30 minutes. After mixing, samples were left to sit for 5 minutes for phase separation. About 2600 µL of supernatant MTBE was transferred to a tube containing 250 µl of MilliQ water. Samples were then evaporated with a vacuum centrifuge at 30°C until the volume condensed to 250 µl (~ 10 minutes). The eluted sample (20 µl) was injected onto the mass spectrometer.

### Validation Summary Table for NDMA Urine Method

| Description                    | NDMA                                                                                                                                                                                             |
|--------------------------------|--------------------------------------------------------------------------------------------------------------------------------------------------------------------------------------------------|
| Short description of method    | Liquid-Liquid extraction with reverse-phase HPLC with MS/MS detection                                                                                                                            |
| Matrix                         | Human urine and surrogate (water)                                                                                                                                                                |
| Analyte                        | N-Nitrosodimethylamine (NDMA)                                                                                                                                                                    |
| Internal standard (IS)         | NDMA-d <sub>6</sub> (deuterated NDMA)                                                                                                                                                            |
| Calibration concentrations     | 15.6 pg/mL to 2000.0 pg/mL                                                                                                                                                                       |
| QC concentrations              | Surrogate: 15.6 pg/mL (LLOQ), 30.0 pg/mL (LQC), 800.0 pg/mL (MQC1), and 1600.0 pg/mL (HQC)<br>Urine: 250.0 pg/mL (UQC1) and 1000.0 pg/mL (UQC2)                                                  |
| Selectivity                    | Interference was observed in some lots of human urine. Thus, water was used as surrogate matrix (surrogate).                                                                                     |
| Specificity                    | No interference observed                                                                                                                                                                         |
| Lower limit of quantification  | 15.6 pg/mL<br>Between-run accuracy 101.5% (surrogate)<br>Between-run precision 11.7% (surrogate)<br>Within-run accuracy 100.8%-102.8% (surrogate)<br>Within-run precision 9.0%-14.4% (surrogate) |
| Between-run accuracy           | Surrogate: 99.2%-100.3%<br>Urine: 101.5%-109.4%                                                                                                                                                  |
| Between-run precision          | Surrogate: 4.5%-13.8%<br>Urine: 10.3%-12.3%                                                                                                                                                      |
| Within-run accuracy            | Batch 1: 91.7%-112.8% (urine); 100.1%-113.8% (surrogate)<br>Batch 2: 102.8%-105.6% (urine); 91.2%-99.5% (surrogate)<br>Batch 3: 100.6%-111.0% (urine); 87.5%-107.5% (surrogate)                  |
| Within-run precision           | Batch 1: 3.7%-5.8% (urine); 2.7%-9.6% (surrogate)<br>Batch 2: 4.0%-4.4% (urine); 2.5%-9.1% (surrogate)<br>Batch 3: 1.7%-4.9% (urine); 2.0%-5.4% (surrogate)                                      |
| Matrix effect (IS-normalized)  | LQC: 0.89 (5.7 %CV) (surrogate)<br>HQC: 0.88 (1.1 %CV) (surrogate)                                                                                                                               |
| Recovery of analyte            | 70.4% -90.2% (urine)                                                                                                                                                                             |
| Recovery of IS                 | 15.7% (urine)                                                                                                                                                                                    |
| Auto-sampler storage stability | Confirmed up to 24 hours at 10°C nominal<br>Accuracy 109.1% for UQC1 and 102.1% for UQC2 in urine<br>Accuracy 105.7% for LQC and 102.2% for HQC in surrogate                                     |
| Freeze-thaw stability          | Confirmed up to 8 cycles<br>Accuracy 98.2% for UQC1 and 90.2% for UQC2 in urine                                                                                                                  |
| Bench top stability            | Confirmed up to 24 hours at room temperature<br>Accuracy 101.9% for UQC1 and 114.1% for UQC2 in urine<br>Accuracy 106.5% for LQC and 102.7% for HQC in surrogate                                 |
| Injector Carryover             | Not significant (0.0%)                                                                                                                                                                           |
| Long Term Storage Stability    | Confirmed up to 211 days at -80°C<br>Accuracy 94.3% for UQC1 and 89.0% for UQC2 in urine                                                                                                         |

## Bioanalytical Method Conditions for NDMA Plasma Method

Validation range: 15.6–2000.0 pg/mL  
 High Performance Liquid Chromatography (HPLC) instrument: Agilent 1290 Infinity  
 Mass Spectrometer: AB SCIEX 6500+ Qtrap Mass spectrometer

### HPLC Conditions

Mobile Phase: 10 mM ammonium formate with 0.1% formic acid in water and acetonitrile (Gradient flow)  
 Flow rate: 0.4 mL/min  
 Column: Kinetex Biphenyl 100 Å (2.1 x 50 mm) 5.0 µm  
 Injection Volume: 20 µL  
 Retention Time: NDMA: 1.12 minutes  
 NDMA-d<sub>6</sub>: 1.12 minutes  
 Run Time: 3.5 minutes

### Mass Spectrometer conditions

Ionization Source and scan type: Atmospheric Pressure Chemical Ionization (APCI)  
 Multiple Reaction Monitoring (MRM)  
 Data acquisition: Analyst 1.7.1

AB SCIEX 6500+ Q-TRAP mass spectrometer state file parameters:

| Parameter                     | Positive mode |                     |
|-------------------------------|---------------|---------------------|
|                               | NDMA          | NDMA-d <sub>6</sub> |
| Q1 mass/Q3 mass (amu)         | 75.1/43.1     | 81/46               |
| Collision Energy (V)          | 19            | 21                  |
| Declustering Potential        | 90            | 60                  |
| Entrance Potential            | 10            | 8                   |
| Collision Cell Exit Potential | 10            | 10                  |
| Source Temperature (°C):      | 350           | 350                 |
| Ion Source Gas 1              | 90            | 90                  |
| Curtain Gas Flow              | 30            | 30                  |
| Collision Gas Flow            | 8             | 8                   |
| Nebulizer Current             | 5             | 5                   |
| Dwell time (ms)               | 150           | 150                 |

**Sample Preparation:** Sample preparation involved the extraction of NDMA from the samples using liquid-liquid extraction (LLE). First, 0.5 ml of surrogate/urine sample (CC or QC) and 10 µl of internal standard (100.0 ng/mL of NDMA-d<sub>6</sub> in 10mM ammonium formate with 0.1% formic acid) was mixed. After vortexing, 100 µl of extraction additive (1N NaOH) was added. Later, 2 ml of MTBE (methyl tert-butyl ether) was added to each sample followed by 30 minutes of vigorous mixing at 2500 rpm for 30 minutes. After mixing, the samples were left to sit for 5 minutes for phase separation. About 1700 µL of supernatant MTBE was transferred to a tube containing 200 µl of MilliQ water. Samples were then evaporated with a vacuum centrifuge at 30°C until the volume condensed to 200 µl (~ 10 minutes). The eluted sample (20 µl) was injected onto the mass spectrometer.

**Validation Summary Table for NDMA Plasma Method**

| <b>Description</b>             | <b>NDMA</b>                                                                                                                                                                                       |
|--------------------------------|---------------------------------------------------------------------------------------------------------------------------------------------------------------------------------------------------|
| Short description of method    | Liquid-Liquid extraction with reverse-phase HPLC with MS/MS detection                                                                                                                             |
| Matrix                         | Human plasma and surrogate (5% bovine serum albumin, BSA)                                                                                                                                         |
| Analyte                        | N-Nitrosodimethylamine (NDMA)                                                                                                                                                                     |
| Internal standard (IS)         | NDMA-d <sub>6</sub> (deuterated NDMA)                                                                                                                                                             |
| Calibration concentrations     | 15.6 pg/mL to 2000.0 pg/mL                                                                                                                                                                        |
| QC concentrations              | Surrogate: 15.6 pg/mL (LLOQ), 46.8 pg/mL (LQC), 750.0 pg/mL (MQC1), and 1500.0 pg/mL (HQC)<br>Plasma: 120.0 pg/mL (PQC1) and 400.0 pg/mL (PQC2)                                                   |
| Selectivity                    | Significant interference was observed in human plasma. Thus, 5% BSA used as surrogate matrix (surrogate).                                                                                         |
| Specificity                    | No interference observed                                                                                                                                                                          |
| Lower limit of quantification  | 15.6 pg/mL<br>Between-run accuracy 109.4% (surrogate)<br>Between-run precision 13.7% (surrogate)<br>Within-run accuracy 105.4%-113.8% (surrogate)<br>Within-run precision 12.4%-15.4% (surrogate) |
| Between-run accuracy           | Surrogate: 100.5%-109.4%<br>Plasma: 97.3%-101.9%                                                                                                                                                  |
| Between-run precision          | Surrogate: 5.0%-13.7%<br>Plasma: 4.7%-6.1%                                                                                                                                                        |
| Within-run accuracy            | Batch 1: 95.9%-96.7% (plasma); 97.6%-109.6% (surrogate)<br>Batch 2: 94.3%-102.7% (plasma); 99.9%-108.8% (surrogate)<br>Batch 3: 102.0%-106.4% (plasma); 103.9%-113.8% (surrogate)                 |
| Within-run precision           | Batch 1: 3.7%-5.8% (plasma); 2.3%-15.4% (surrogate)<br>Batch 2: 4.0%-4.4% (plasma); 3.7%-12.4% (surrogate)<br>Batch 3: 1.7%-4.9% (plasma); 3.6%-15.2% (surrogate)                                 |
| Matrix effect (IS-normalized)  | LQC: 1.16 (2.4 %CV) (surrogate)<br>HQC: 1.02 (1.7 %CV) (surrogate)                                                                                                                                |
| Recovery of analyte            | 40.0% -49.5% (plasma)                                                                                                                                                                             |
| Recovery of IS                 | 43.3% (plasma)                                                                                                                                                                                    |
| Auto-sampler storage stability | Confirmed up to 24 hours at 10°C nominal<br>Accuracy 109.2% for PQC1 and 97.3% for PQC2 in plasma<br>Accuracy 112.6% for LQC and 95.7% for HQC in surrogate                                       |
| Freeze-thaw stability          | Confirmed up to 8 cycles<br>Accuracy 90.8% for PQC1 and 93.4% for PQC2 in plasma                                                                                                                  |
| Bench top stability            | Confirmed up to 24 hours at room temperature<br>Accuracy 108.4% for PQC1 and 101.3% for PQC2 in plasma<br>Accuracy 107.7% for LQC and 108.3% for HQC in surrogate                                 |
| Injector Carryover             | Not significant (0.0%)                                                                                                                                                                            |
| Long Term Storage Stability    | Confirmed up to 211 days at -80°C<br>Accuracy 97.7% for PQC1 and 90.5% for PQC2 in plasma                                                                                                         |

## Bioanalytical Method Conditions for DMA Method (Common Method for Urine and Plasma)

Validation range: 500.0–128000.0 ng/mL  
 High Performance Liquid Chromatography (HPLC) instrument: Agilent 1290 Infinity  
 Mass Spectrometer: AB SCIEX 6500+ Qtrap Mass spectrometer

### HPLC Conditions

Mobile Phase: 10 mM ammonium formate with 0.1% formic acid in water and acetonitrile (Gradient flow)  
 Flow rate: 0.3 mL/min  
 Column: Kinetex XB, C18, 2.1\*100 A, 100 X 2.1 mm  
 Injection Volume: 3 µL  
 Retention Time: DMA: 0.88 minute  
 DMA-d<sub>3</sub>: 0.88 minute  
 Run Time: 2.4 minutes

### Mass Spectrometer conditions

Ionization Source and scan type: Atmospheric Pressure Chemical Ionization (APCI)  
 Multiple Reaction Monitoring (MRM)  
 Data acquisition: Analyst 1.7.1

AB SCIEX 6500+ Q-TRAP mass spectrometer state file parameters:

| Parameter                     | Positive mode |                    |
|-------------------------------|---------------|--------------------|
|                               | DMA           | DMA-d <sub>3</sub> |
| Q1 mass/Q3 mass (amu)         | 46.2/30.1     | 49.2/32.2          |
| Collision Energy (V)          | 26            | 26                 |
| Declustering Potential        | 125           | 100                |
| Entrance Potential            | 4             | 7                  |
| Collision Cell Exit Potential | 8             | 10                 |
| Source Temperature (°C):      | 550           | 550                |
| Ion Source Gas 1              | 50            | 50                 |
| Curtain Gas Flow              | 40            | 40                 |
| Collision Gas Flow            | Medium        | Medium             |
| Nebulizer Current             | 5             | 5                  |
| Dwell time (ms)               | 150           | 150                |

**Sample Preparation:** Sample preparation involved the extraction of DMA from the samples using protein precipitation/sample dilution. An aliquot of 120 µl of acetonitrile containing 0.66 µg/ml of dimethylamine-d<sub>3</sub> (internal standard) was added to 96-well protein precipitation plates to which 5 µl of plasma or urine or surrogate sample was added. The samples were shaken at 700 rpm for 5 minutes, followed by the addition of 100 µl of surrogate sample and shaken at 350 rpm for 5 minutes. Later, the samples were centrifuged at 4000 rpm for 10 minutes with a collection plate at the bottom. The sample (3 µl) was injected into the mass spectrometer.

### Validation Summary Table for DMA Method

| Description                    | DMA                                                                                                                                                                                                           |
|--------------------------------|---------------------------------------------------------------------------------------------------------------------------------------------------------------------------------------------------------------|
| Short description of method    | Protein Precipitation with reverse-phase HPLC with MS/MS detection                                                                                                                                            |
| Matrix                         | Human plasma, Human urine and surrogate (0.05% phosphate buffer with 10% v/v methanol)                                                                                                                        |
| Analyte                        | Dimethylamine (DMA)                                                                                                                                                                                           |
| Internal standard (IS)         | DMA-d <sub>3</sub> (deuterated DMA)                                                                                                                                                                           |
| Calibration concentrations     | 500.0 ng/mL to 128000.0 ng/mL                                                                                                                                                                                 |
| QC concentrations              | Surrogate: 500.0 ng/mL (LLOQ), 1200.0 ng/mL (LQC), 5000.0 ng/mL (MQC1), 50000.0 ng/mL (MQC2), and 110000.0 ng/mL (HQC)<br>Plasma: 110000.0 ng/mL (PQC)<br>Urine: 110000.0 ng/mL (UQC)                         |
| Selectivity                    | Significant interference was observed in human plasma and urine. Thus, 0.05% phosphate buffer with 10% v/v methanol was used as a surrogate matrix (surrogate).                                               |
| Specificity                    | No interference observed                                                                                                                                                                                      |
| Lower limit of quantification  | 500.0 ng/mL<br>Between-run accuracy 96.4.4% (surrogate)<br>Between-run precision 14.0% (surrogate)<br>Within-run accuracy 91.0%-101.6% (surrogate)<br>Within-run precision 10.9%-16.2% (surrogate)            |
| Between-run accuracy           | Surrogate: 94.2%-101.1%<br>Plasma: 103.6%<br>Urine: 107.5%                                                                                                                                                    |
| Between-run precision          | Surrogate: 3.2%-14.0%<br>Plasma: 4.6%<br>Urine: 7.7%                                                                                                                                                          |
| Within-run accuracy            | Batch 1: 92.4%-102.2% (surrogate); 102.2% (plasma); 98.4% (urine)<br>Batch 2: 91.0%-109.5% (surrogate); 106.3% (plasma); 114.5% (urine)<br>Batch 3: 87.4%-115.2% (surrogate); 102.3% (plasma); 109.6% (urine) |
| Within-run precision           | Batch 1: 0.9%-16.2% (surrogate); 2.9% (plasma); 1.5% (urine)<br>Batch 2: 2.1%-14.2% (surrogate); 5.9% (plasma); 4.0% (urine)<br>Batch 3: 1.9%-10.9% (surrogate); 4.1% (plasma); 6.2% (urine)                  |
| Matrix effect (IS-normalized)  | LQC: 1.01 (2.1 %CV)<br>HQC: 0.98 (2.0 %CV)                                                                                                                                                                    |
| Recovery of analyte            | 99.7% -113.0%                                                                                                                                                                                                 |
| Recovery of IS                 | 107.8%                                                                                                                                                                                                        |
| Auto-sampler storage stability | Confirmed up to 24 hours at 10°C nominal<br>Accuracy 105.1% for UQC in urine<br>Accuracy 104.8% for PQC in plasma<br>Accuracy 90.1% for LQC and 95.3% for HQC in surrogate                                    |
| Freeze-thaw stability          | Confirmed up to 8 cycles<br>Accuracy 101.1% for UQC in urine<br>Accuracy 107.1% for PQC in plasma                                                                                                             |
| Bench top stability            | Confirmed up to 24 hours at room temperature<br>Accuracy 102.5% for UQC in urine<br>Accuracy 99.1% for PQC in plasma<br>Accuracy 103.9% for LQC and 101.8% for HQC in surrogate                               |
| Injector Carryover             | Not significant (0.0%)                                                                                                                                                                                        |
| Long Term Storage Stability    | Confirmed up to 234 days at -80°C<br>Accuracy 104.3% for PQC and 106.8% for UQC                                                                                                                               |

## Bioanalytical Method Conditions for Ranitidine Urine Method

Validation range: 15.6–4000.0 ng/mL  
 High Performance Liquid Chromatography (HPLC) instrument: Agilent 1290 Infinity  
 Mass Spectrometer: AB SCIEX 6500+ Qtrap Mass spectrometer

### HPLC Conditions

Mobile Phase: 10 mM ammonium formate with 0.1% formic acid in water and acetonitrile (Gradient flow)  
 Flow rate: 0.3 mL/min  
 Column: Acquity UPLC BEH, Shield, RP18, 2.1\*50mm, 1.7µm  
 Injection Volume: 20 µL  
 Retention Time: Ranitidine: 1.75 minute  
 Ranitidine-d<sub>6</sub>: 1.75 minute  
 Run Time: 2.5 minutes

### Mass Spectrometer conditions

Ionization Source and scan type: Atmospheric Pressure Chemical Ionization (APCI)  
 Multiple Reaction Monitoring (MRM)  
 Data acquisition: Analyst 1.7.1

AB SCIEX 6500+ Q-TRAP mass spectrometer state file parameters:

| Parameter                     | Positive mode |                           |
|-------------------------------|---------------|---------------------------|
|                               | Ranitidine    | Ranitidine-d <sub>6</sub> |
| Q1 mass/Q3 mass (amu)         | 315.1/176.1   | 321.1/176.1               |
| Collision Energy (V)          | 20            | 25                        |
| Declustering Potential        | 100           | 100                       |
| Entrance Potential            | 10            | 4                         |
| Collision Cell Exit Potential | 10            | 10                        |
| Source Temperature (°C):      | 500           | 500                       |
| Ion Source Gas 1              | 50            | 50                        |
| Curtain Gas Flow              | 30            | 30                        |
| Collision Gas Flow            | Medium        | Medium                    |
| Nebulizer Current             | 5             | 5                         |
| Dwell time (ms)               | 100           | 100                       |

**Sample Preparation:** Sample preparation involved the extraction of ranitidine from the samples using protein precipitation/sample dilution. An aliquot of 200 µl of acetonitrile containing 0.2 µg/ml of ranitidine-d<sub>6</sub> (internal standard) was added to 96-well protein precipitation plates and 20µl of the urine sample was aliquoted to each well. The samples were shaken at 700 rpm for 5 minutes. Later, the samples were centrifuged at 4000 rpm for 10 minutes with a bottom collection plate containing 40 µl of water in each well. The plate was shaken for 5 minutes at 700 rpm and the sample (3 µl) was injected into the mass spectrometer.

### Validation Summary Table for Ranitidine Urine Method

| Description                    | Ranitidine                                                                                                                                    |
|--------------------------------|-----------------------------------------------------------------------------------------------------------------------------------------------|
| Short description of method    | Protein precipitation with reverse-phase HPLC with MS/MS detection                                                                            |
| Matrix                         | Human urine                                                                                                                                   |
| Analyte                        | Ranitidine                                                                                                                                    |
| Internal standard (IS)         | Ranitidine-d <sub>6</sub>                                                                                                                     |
| Calibration concentrations     | 15.6 ng/mL to 4000.0 ng/mL                                                                                                                    |
| QC concentrations              | 15.6 ng/mL (LLOQ), 50.0 ng/mL (LQC), 200.0 ng/mL (MQC1), 1600.0 (MQC2) ng/mL and 3200.0 ng/mL (HQC)                                           |
| Selectivity                    | No significant interference was observed (less than 20% LLOQ response)                                                                        |
| Specificity                    | No significant interference observed (less than 20% LLOQ response)                                                                            |
| Lower limit of quantification  | 15.6 ng/mL<br>Between-run accuracy 104.5%<br>Between-run precision 5.1%<br>Within-run accuracy 99.4%-108.8%<br>Within-run precision 3.2%-4.0% |
| Between-run accuracy           | 97.4%-104.5%                                                                                                                                  |
| Between-run precision          | 2.0%-5.1%                                                                                                                                     |
| Within-run accuracy            | Batch 1: 95.8%-108.2%<br>Batch 2: 96.4%-108.9%<br>Batch 3: 99.4%-110.4%                                                                       |
| Within-run precision           | Batch 1: 1.5%-3.2%<br>Batch 2: 0.7%-3.8%<br>Batch 3: 1.2%-3.5%                                                                                |
| Matrix effect (IS-normalized)  | LQC: 1.01 (2.1 %CV)<br>HQC: 0.98 (2.0 %CV)                                                                                                    |
| Recovery of analyte            | 93.7% -95.0%                                                                                                                                  |
| Recovery of IS                 | 84.1%                                                                                                                                         |
| Auto-sampler storage stability | Confirmed up to 36 hours at 10°C nominal<br>Accuracy 109.2% for LQC and 105.7% for HQC                                                        |
| Freeze-thaw stability          | Confirmed up to 8 cycles<br>Accuracy 103.9% for LQC and 98.3% for HQC                                                                         |
| Bench top stability            | Confirmed up to 24 hours at room temperature<br>Accuracy 101.8% for LQC and 100.7% for HQC                                                    |
| Injector Carryover             | Not significant (0.0%)                                                                                                                        |
| Long Term Storage Stability    | Confirmed up to 235 days at -80°C<br>Accuracy 97.5% for LQC and 100.7% for HQC                                                                |



## Bioanalytical Method Conditions for Ranitidine Plasma Method

Validation range: 15.6–4000.0 ng/mL  
 High Performance Liquid Chromatography (HPLC) instrument: Agilent 1290 Infinity  
 Mass Spectrometer: AB SCIEX 6500+ Qtrap Mass spectrometer

### HPLC Conditions

Mobile Phase: 10 mM ammonium formate with 0.1% formic acid in water and acetonitrile (Gradient flow)  
 Flow rate: 0.3 mL/min  
 Column: Acquity UPLC BEH, Shield, RP18, 2.1\*50mm, 1.7µm  
 Injection Volume: 20 µL  
 Retention Time: Ranitidine: 1.75 minute  
 Ranitidine-d<sub>6</sub>: 1.75 minute  
 Run Time: 2.5 minutes

### Mass Spectrometer conditions

Ionization Source and scan type: Atmospheric Pressure Chemical Ionization (APCI)  
 Multiple Reaction Monitoring (MRM)  
 Data acquisition: Analyst 1.7.1

AB SCIEX 6500+ Q-TRAP mass spectrometer state file parameters:

| Parameter                     | Positive mode |                           |
|-------------------------------|---------------|---------------------------|
|                               | Ranitidine    | Ranitidine-d <sub>6</sub> |
| Q1 mass/Q3 mass (amu)         | 315.1/176.1   | 321.1/176.1               |
| Collision Energy (V)          | 20            | 25                        |
| Declustering Potential        | 100           | 100                       |
| Entrance Potential            | 10            | 4                         |
| Collision Cell Exit Potential | 10            | 10                        |
| Source Temperature (°C):      | 500           | 500                       |
| Ion Source Gas 1              | 50            | 50                        |
| Curtain Gas Flow              | 30            | 30                        |
| Collision Gas Flow            | Medium        | Medium                    |
| Nebulizer Current             | 5             | 5                         |
| Dwell time (ms)               | 100           | 100                       |

**Sample Preparation:** Sample preparation involved the extraction of ranitidine from the samples using protein precipitation. An aliquot of 200 µl of acetonitrile containing 0.2 µg/ml of ranitidine-d<sub>6</sub> (internal standard) was added to 96-well protein precipitation plates and 20µl of plasma sample was aliquoted to each well. The samples were shaken at 700 rpm for 5 minutes. Later, the samples were centrifuged at 4000 rpm for 10 minutes with a bottom collection plate and the sample (3 µl) was injected into the mass spectrometer.

**Validation Summary Table for Ranitidine Plasma Method**

| <b>Description</b>             | <b>Ranitidine</b>                                                                                                                               |
|--------------------------------|-------------------------------------------------------------------------------------------------------------------------------------------------|
| Short description of method    | Protein precipitation with reverse-phase HPLC with MS/MS detection                                                                              |
| Matrix                         | Human Plasma                                                                                                                                    |
| Analyte                        | Ranitidine                                                                                                                                      |
| Internal standard (IS)         | Ranitidine-d <sub>6</sub>                                                                                                                       |
| Calibration concentrations     | 15.6 ng/mL to 4000.0 ng/mL                                                                                                                      |
| QC concentrations              | 15.6 ng/mL (LLOQ), 50.0 ng/mL (LQC), 200.0 ng/mL (MQC1), 1600.0 (MQC2) ng/mL and 3200.0 ng/mL (HQC)                                             |
| Selectivity                    | No significant interference was observed (less than 20% LLOQ response)                                                                          |
| Specificity                    | No significant interference observed (less than 20% LLOQ response)                                                                              |
| Lower limit of quantification  | 15.6 ng/mL<br>Between-run accuracy 107.7%<br>Between-run precision 14.4%<br>Within-run accuracy 106.0%-109.0%<br>Within-run precision 3.0%-5.1% |
| Between-run accuracy           | 100.1%-108.8%                                                                                                                                   |
| Between-run precision          | 2.0%-3.1%                                                                                                                                       |
| Within-run accuracy            | 98.8%-111.0%                                                                                                                                    |
| Within-run precision           | 0.9%-3.2%                                                                                                                                       |
| Matrix effect (IS-normalized)  | LQC: 1.06 (1.4 %CV)<br>HQC: 1.02 (0.9 %CV)                                                                                                      |
| Recovery of analyte            | 75.8% -86.2%                                                                                                                                    |
| Recovery of IS                 | 79.9%                                                                                                                                           |
| Auto-sampler storage stability | Confirmed up to 36 hours at 10°C nominal<br>Accuracy 107.9% for LQC and 101.8% for HQC                                                          |
| Freeze-thaw stability          | Confirmed up to 8 cycles<br>Accuracy 96.7% for LQC and 95.2% for HQC                                                                            |
| Bench top stability            | Confirmed up to 24 hours at room temperature<br>Accuracy 103.4% for LQC and 97.8% for HQC                                                       |
| Injector Carryover             | Not significant (0.0%)                                                                                                                          |
| Long Term Storage Stability    | Confirmed up to 234 days at -80°C<br>Accuracy 100.5% for LQC and 91.2% for HQC                                                                  |

## Ex vivo Stability Evaluation

### Ex vivo stability Evaluation

The potential for *ex vivo* conversion of ranitidine to NDMA was evaluated by performing a series of *in vitro* experiments prior to the execution of the clinical study. The details of the experimental design and results are summarized below.

### Experimental design

The *ex vivo* stability of ranitidine in urine was evaluated at room temperature (24°C) and at 37°C in the presence and absence of externally spiked nitrites (10 mM) and nitrates (100 ug/mL). During the stability assessment, the urine samples were spiked with ranitidine (300 ug/mL), ranitidine N-oxide (40 ug/mL), ranitidine S-oxide (16 ug/mL) and desmethyl ranitidine (10 ug/mL) prior to the incubations. Stabilities were evaluated at three different pH values (4.5, 6.0 and 8.0). The urine samples were incubated, and measurements were collected from the samples at different timepoints (from 0 minutes to 240 minutes). NDMA in samples was quantified by liquid chromatography and tandem mass spectrometric methods and compared against the 0-minute levels. The percent conversion was considered significant if the conversion was greater than 20%.

### Results

The conversion (formation of NDMA) was increased by higher temperature (37°C) and lower pH (4.0) and consistently increased with time. The conversion was minimized by adjusting the pH to alkaline conditions (pH 8.0). The summary of results is shown in Figures 1 to 3.

### Conclusions

*Ex vivo* conversion of ranitidine and ranitidine metabolites to NDMA was minimized by adjusting the pH to alkaline conditions (pH 8.0) and maintaining lower temperatures.

**Figure 1: Formation of NDMA in urine in the presence of ranitidine and ranitidine metabolites with and without nitrites/nitrates at pH 4.5**

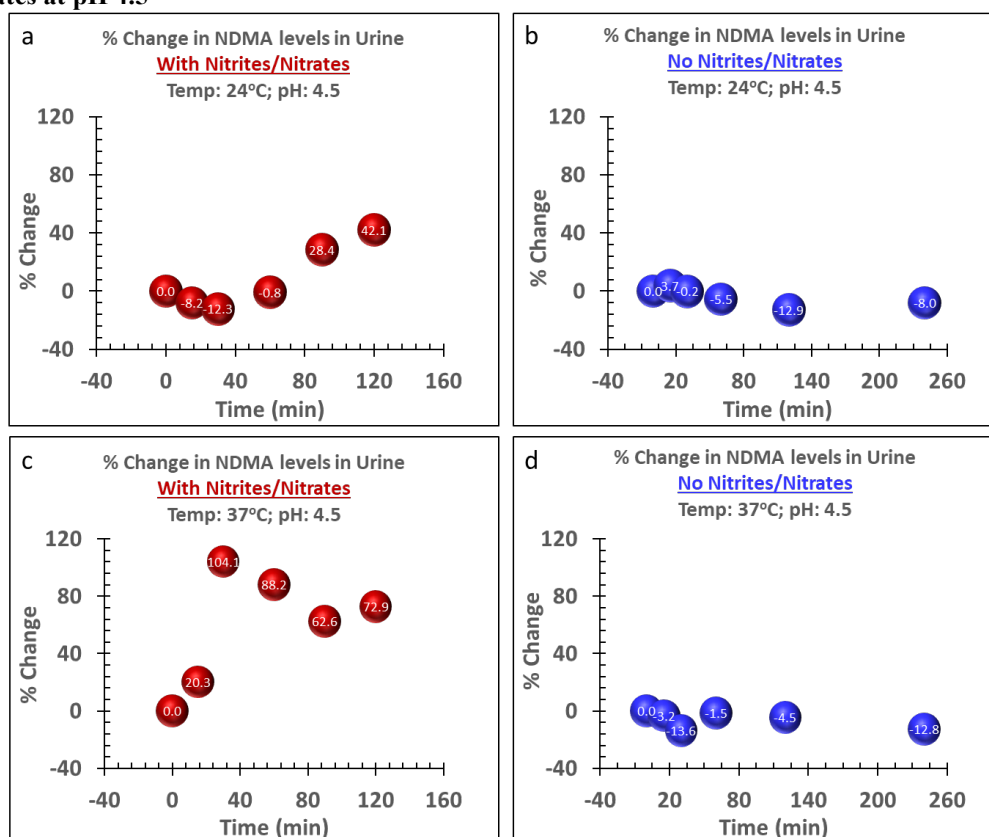

Conversion (>20%) to NDMA was observed at both tested temperatures in the presence of nitrates (100 ug/mL) and nitrites (10 mM) (a and c). No conversion (<20%) to NDMA was observed in the absence of nitrates and nitrates (b and d).

**Figure 2: Formation of NDMA in urine in the presence of ranitidine and ranitidine metabolites with and without nitrites/nitrates at pH 6.0**

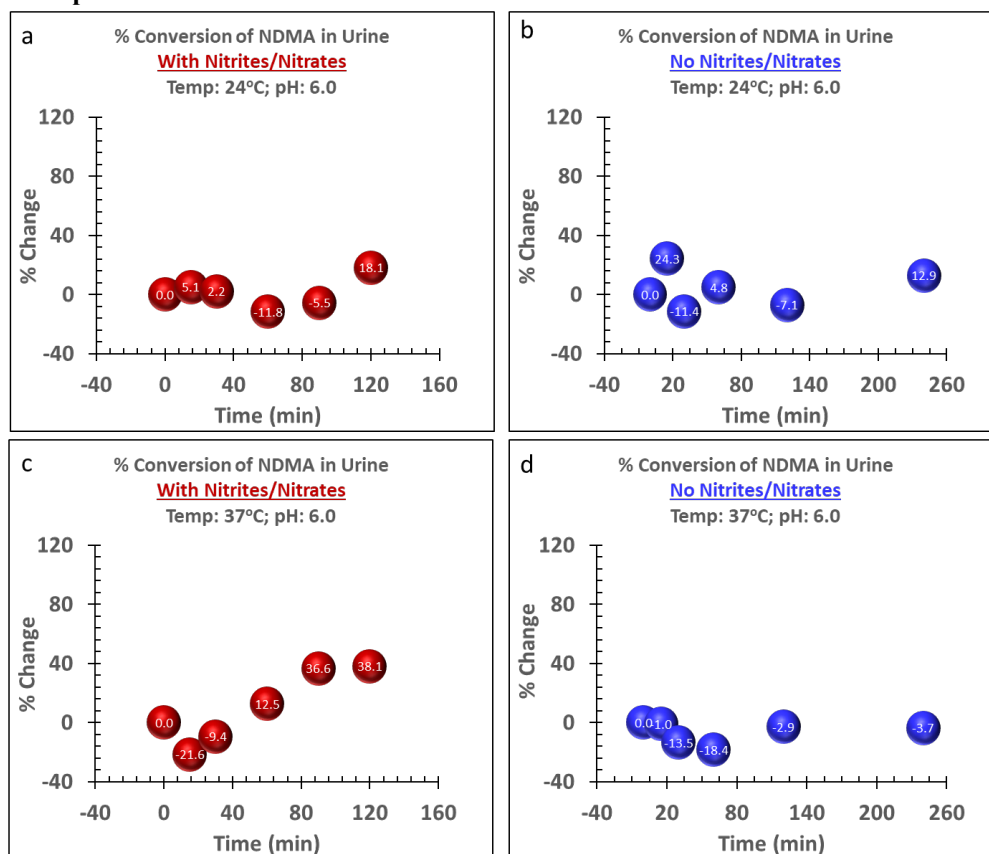

Conversion (> 20%) to NDMA was observed at high temperatures (37°C) in the presence of nitrates (100 ug/mL) and nitrites (10 mM) (c). No conversion (< 20%) to NDMA was observed in the absence of nitrates and nitrites (b and d) and at room temperature in the presence of nitrates (100 ug/mL) and nitrites (10 mM) (a).

**Figure 3: Formation of NDMA in urine in the presence of ranitidine and ranitidine metabolites with nitrites/nitrates at pH 8.0**

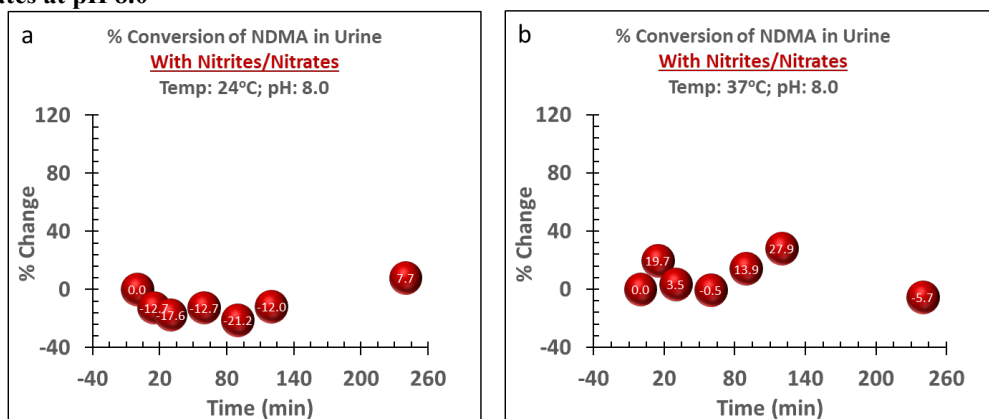

No conversion (< 20%) to NDMA was observed at both tested temperatures in the presence of nitrites and nitrates (a & b).

## eDictionary. Data Dictionary for Participant Data Listings

A full listing of participant data, including demographics and concentrations/amount by analyte and biospecimen at each time point are included with the study datasets. Column names and definitions are provided below. Separate datasets are provided for the plasma and urine data.

| Variable       | Definition                                                                                                                                                                             |
|----------------|----------------------------------------------------------------------------------------------------------------------------------------------------------------------------------------|
| SubjectID      | Participant ID                                                                                                                                                                         |
| Period         | One of 1, 2, 3, or 4, corresponding to study period when data was collected                                                                                                            |
| Time           | Nominal sampling time (unit = hours). Unscheduled voids are NA                                                                                                                         |
| SampleTimeC    | Sample time as character. Unscheduled urine samples are labeled as 'Unscheduled'                                                                                                       |
| Analyte        | Measured analyte. One of NDMA, DMA, or ranitidine                                                                                                                                      |
| Units          | Units for the reported 'Concentration' variable. Units are ng/mL for ranitidine and DMA and pg/mL for NDMA (note – these are sample concentrations – need amounts for urine analyses). |
| Concentration  | Reported concentration with values below lower limit of quantification set to zero. (units are defined in Units)                                                                       |
| ConcentrationC | Character concentration from bioanalytical readout                                                                                                                                     |
| Specimen       | Denotes whether the sample was from plasma or urine                                                                                                                                    |
| EarlyTerm      | Flag for if the sample was an early termination collection                                                                                                                             |
| sample_ct      | Count of sample by participant by period – this is the ordering to use for urine samples since there were unscheduled voids                                                            |
| Treatment      | One of Ranitidine or Placebo, corresponding to treatment received during the periods                                                                                                   |
| Meal           | One of L or H, corresponding to if participant was administered a noncured-meats/organic-vegetables or cured-meats/conventional-vegetables diet, respectively                          |
| Sequence       | One of ABCD, ABDC, BACD, or BADC, corresponding to sequence the participant was randomized to                                                                                          |
| Age            | Age of the participant (unit = years)                                                                                                                                                  |
| Sex            | Sex of the participant (one of 'Female' or 'Male')                                                                                                                                     |
| Ethnicity      | Ethnicity of the participant (one of 'Hispanic or Latino' or 'Not Hispanic or Latino')                                                                                                 |
| Race           | Race of the participant (one of 'Asian', 'Black or African American', or 'White')                                                                                                      |
| Weight         | Weight of the participant (unit = kg)                                                                                                                                                  |
| TimeAccum      | For urine datasets – for grouping unscheduled voids as part of the next planned collection interval                                                                                    |
| UrineVolume    | For urine datasets – volume of the urine void (mL)                                                                                                                                     |
| Amount         | For urine datasets – total amount of analyte in the urine void (ng for NDMA; mg for DMA and ranitidine)                                                                                |
| AmountUse      | For urine datasets - same as Amount but with time=0 set to 0 (do not include in 24-hr total)                                                                                           |
| AmountUnits    | For urine datasets - units are mg for amount of ranitidine and DMA in urine and ng for amount of NDMA in urine                                                                         |
| AccumAmount    | For urine datasets – cumulative amount of analyte in the urine since start of the treatment period (ng for NDMA; mg for DMA and ranitidine)                                            |

## eReferences

1. FDA Updates and Press Announcements on NDMA in Zantac (ranitidine). 2020. <https://www.fda.gov/drugs/drug-safety-and-availability/fda-updates-and-press-announcements-ndma-zantac-ranitidine>. Accessed March 29, 2021.
2. Wang X, Bryan NS, MacArthur PH, Rodriguez J, Gladwin MT, Feelisch M. Measurement of nitric oxide levels in the red cell: validation of tri-iodide-based chemiluminescence with acid-sulfanilamide pretreatment. *J Biol Chem*. 2006;281(37):26994-27002.
3. Dejam A, Hunter CJ, Pelletier MM, Hsu LL, Machado RF, Shiva S, Power GG, Kelm M, Gladwin MT, Schechter AN. Erythrocytes are the major intravascular storage sites of nitrite in human blood. *Blood*. 2005;106(2):734-739.
4. Zeng T, Mitch WA. Oral intake of ranitidine increases urinary excretion of N-nitrosodimethylamine. *Carcinogenesis*. 2016;37(6):625-634.
5. Zeng T, Mitch WA. Retraction to: Oral intake of ranitidine increases urinary excretion of N-nitrosodimethylamine. *Carcinogenesis*. Published online May 4, 2021. doi:10.1093/carcin/bgab029.
6. US Food and Drug Administration. Bioanalytical Method Validation Guidance for Industry. 2018. <https://www.fda.gov/regulatory-information/search-fda-guidance-documents/bioanalytical-method-validation-guidance-industry>. Accessed March 21, 2021.
7. Ranitidine package insert. 2018. <https://dailymed.nlm.nih.gov/dailymed/drugInfo.cfm?setid=4654adbd-c107-4846-9ee6-13f314bc2798>. Accessed April 2, 2021.
8. Bryan N, Osburn W, Keeton J, Hardin M. A national survey of the nitrite/nitrate concentrations in cured meat products and on-meat foods available at retail. 2009. <https://www.pork.org/research/a-national-survey-of-the-nitritenitrate-concentrations-in-cured-meat-products-and-non-meat-foods-available-at-retail/>. Accessed March 19, 2021.
9. Reinik M, Tamme T, Roasto M, Juhkam K, Jurtsenko S, Tenno T, Kiis A. Nitrites, nitrates and N-nitrosoamines in Estonian cured meat products: intake by Estonian children and adolescents. *Food Addit Contam*. 2005;22(11):1098-1105.
10. Park JE, Seo JE, Lee JY, Kwon H. Distribution of seven N-Nitrosamines in food. *Toxicol Res*. 2015;31(3):279-288.
11. Siu DC, Henshall A. Ion chromatographic determination of nitrate and nitrite in meat products. *J Chromatogr A*. 1998;804(1-2):157-160.
12. Hsu J, Arcot J, Lee NA. Nitrate and nitrite quantification from cured meat and vegetables and their estimated dietary intake in Australians. *Food Chemistry*. 2009:334-339.
13. Hord NG, Tang Y, Bryan NS. Food sources of nitrates and nitrites: the physiologic context for potential health benefits. *Am J Clin Nutr*. 2009;90(1):1-10.
14. Griesenbeck JS, Steck MD, Huber JC, Jr., Sharkey JR, Rene AA, Brender JD. Development of estimates of dietary nitrates, nitrites, and nitrosamines for use with the Short Willet Food Frequency Questionnaire. *Nutr J*. 2009;8:16.
15. Iammarino M, Taranto AD. Nitrite and nitrate in fresh meats: a contribution to the estimation of admissible maximum limits to introduce in directive 95/2/EC. *Int J Food Sci Technol*. 2012;47(9):1852-1858.
16. Nunez de Gonzalez M, Osburn W, Hardin M, Longnecker M, Garg H, Bryan N, Keeton J. A survey of nitrate and nitrite concentrations in conventional and organic-labeled raw vegetables at retail. *J Food Sci*. 2015(80):C942-C949.
17. Tamme T, Reinik M, Roasto M, Meremae K, Kiis A. Nitrate in leafy vegetables, culinary herbs, and cucumber grown under cover in Estonia: content and intake. *Food Addit Contam Part B Surveill*. 2010;3(2):108-113.
18. EFSA Panel on contaminants in the food chain. Opinion of the scientific panel on contaminants in the food chain on a request from the European commission to perform a scientific risk assessment on nitrate in vegetables. *EFSA J*. 2008;689:1-79.
19. Susin J, Kmecl V, Gregorcic A. A survey of nitrate and nitrite content of fruit and vegetables grown in Slovenia during 1996-2002. *Food Addit Contam*. 2006;23(4):385-390.
20. Temme EH, Vandevijvere S, Vinx C, Huybrechts I, Goeyens L, Van Oyen H. Average daily nitrate and nitrite intake in the Belgian population older than 15 years. *Food Addit Contam Part A Chem Anal Control Expo Risk Assess*. 2011;28(9):1193-1204.
21. Herencia J, Ruiz-Porrás J, Melero S, Garcia-Galavis P, Morillo E, Macqueda C. Comparison between organic and mineral fertilization for soil fertility levels, crop macronutrient concentrations, and yield. *Argon J*. 2007;99:973-983.

22. Bahadoran Z, Mirmiran P, Jeddi S, Azizi F, Ghasemi A, Hadaegh F. Nitrate and nitrite content of vegetables, fruits, grains, legumes, dairy products, meats and processed meats. *J Food Compost Anal.* 2016;51:93-105.
23. Ding Z, Johanningsmeier S, Price R, Reynolds R, Troung V, Payton S, Breidt F. Evaluation of nitrate and nitrite content in pickled fruits and vegetables. *Food Control.* 2018;90:304-311.
24. Yordanov N, Novakova E, Lubenova S. Consecutive estimation of nitrate and nitrite ions in vegetables and fruits by electron paramagnetic resonance spectrometry. *Anal Chim Acta.* 2001;437:131-138.
25. Keller R, Beaver L, Prater M, Hord N. Dietary nitrate and nitrite concentrations in food patterns and dietary supplements. *Nutr Tod.* 2017;55(5):218-226.
26. WHO Food Additive Series. Safety evaluation of certain food additives and contaminants / prepared by the fifty-ninth meeting of the Joint FAO/WHO Expert Committee on Food Additives (JECFA). 2003. <http://www.inchem.org/documents/jecfa/jecmono/v50je07.htm>. Accessed March 19, 2021.
27. Hedler L, Schurr C, Marquardt P. Determination of volatile N-nitroso compounds in various samples of edible vegetable oils and margarine (commercially available products). *J Am Oil Chem Soc.* 1979;56(7):681-684.
28. Genualdi S, Jeong N, DeJager L. Determination of endogenous concentrations of nitrites and nitrates in different types of cheese in the United States: method development and validation using ion chromatography. *Food Addit Contam Part A Chem Anal Control Expo Risk Assess.* 2018;35(4):614-622.
29. Gray J, Irvine D, Kakuda Y. Nitrates and N-nitrosamines in cheese. *J Food Prot.* 1979;42:263-272.
30. Bologna M, Pop I, Albu A. The assessment of nitrite and nitrate content in mixed feeds and eggs in relation to the production systems (organic vs. conventional). *University of Agr Sc and Vet Med (Iasi).* 2014;1:71-73.
31. Valentine R, Choi J, Chen Z, Barret S, Hwang C, Guo Y, Wehner M, Fitsimmons S, Andrews S, Werker A, Brubacher C, Kohut K. *Factors affecting the formation of NDMA in water and occurrence.* American Water Works Research Foundation; 2006.
32. California Environmental Protection Agency. Public Health Goals for Chemicals in Drinking Water: N-Nitrosodimethylamine. 2006. <https://oehha.ca.gov/media/downloads/water/chemicals/phg/122206ndmaphg.pdf>. Accessed March 31, 2021.
