# Supplementary material
Source: PubMed Central journal article supplement (PMC8240005)
Supplement: jama-e219199-s005.pdf [file jama-e219199-s005.pdf]

## Supplementary Online Content 5

Florian J, Matta MK, DePalma R, et al. Effect of oral ranitidine on urinary excretion of N-nitrosodiethylamine (NDMA): a randomized clinical trial. *JAMA*. doi:10.1001/jama.2021.9199

### Data Sharing Statement

#### Data

**Data available:** Yes

**Data types:** Deidentified participant data, Data dictionary

**How to access data:** Plan to include as a Supplement to the published article on JAMA's website. Deidentified participant data - Supplement 3; Data Dictionary - Supplement 2

**When available:** With publication

### Supporting Documents

**Document types:** None

### Additional Information

**Who can access the data:** Anyone requesting the data

**Types of analyses:** For any purpose

**Mechanisms of data availability:** Data is available at the time of publication
